# Supplementary material
Source: PubMed Central journal article supplement (PMC6819100)
Supplement: jci-129-128293-s120.pdf [file jci-129-128293-s120.pdf]

**JMJD3 regulates CD4 T cell trafficking by targeting actin cytoskeleton regulatory gene *Pdlim4***

Supplemental Figure 1-7

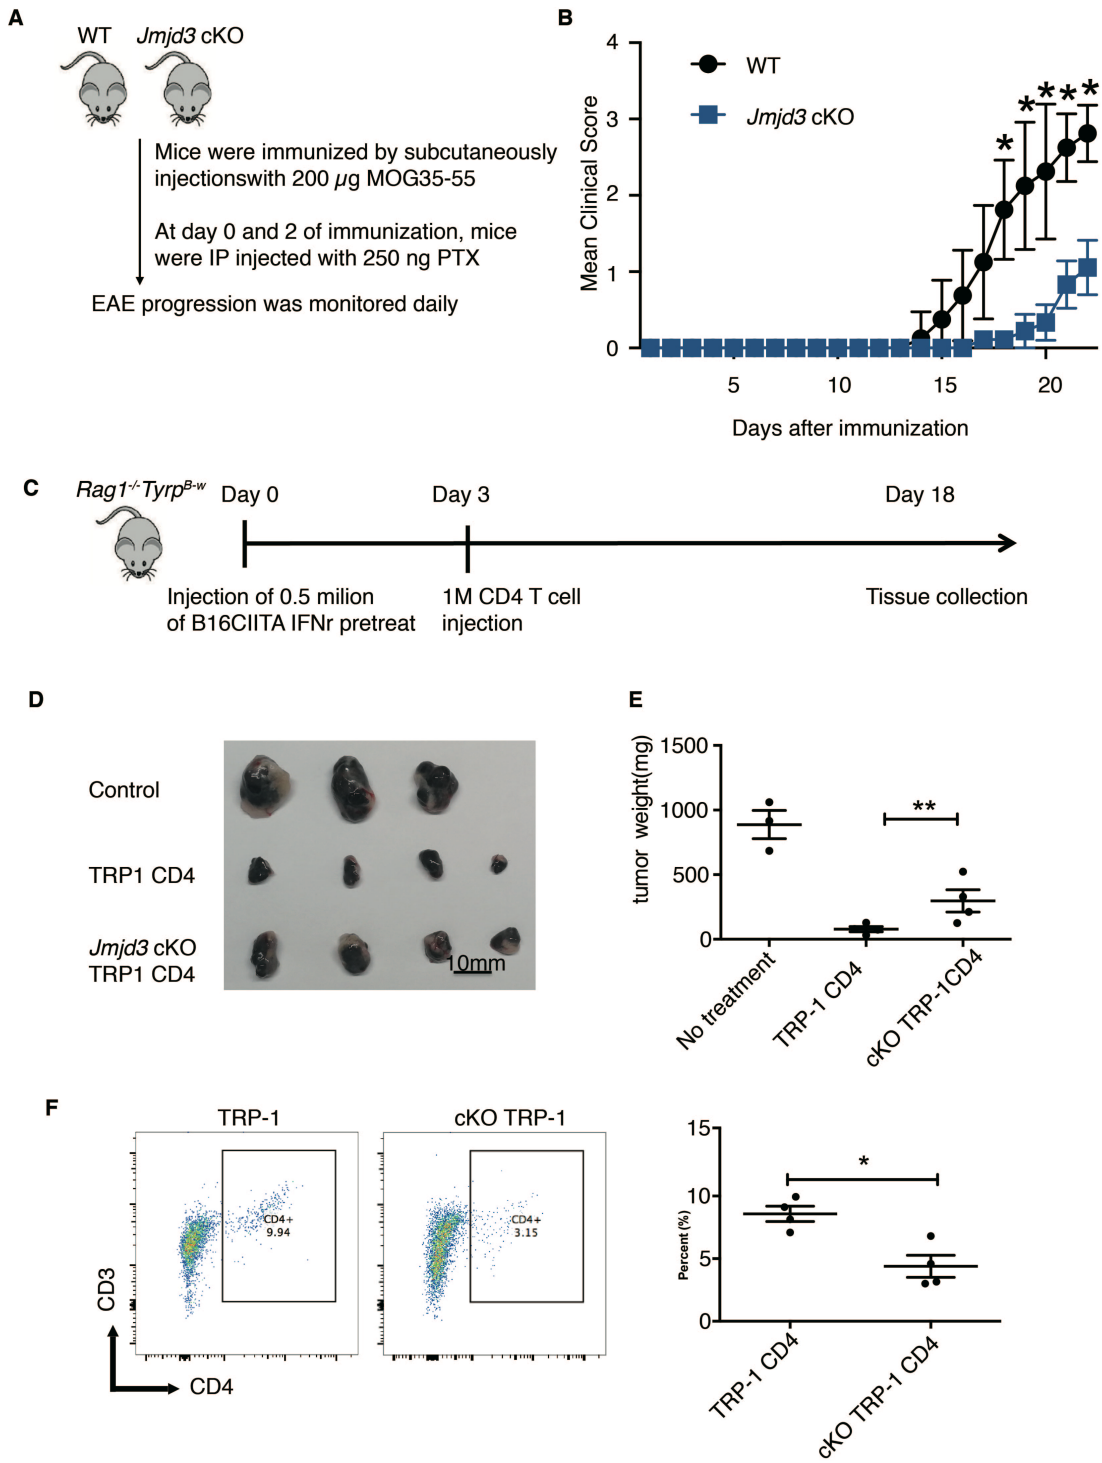

**Supplemental Figure 1.** (A) Schematic presentation of experimental design for the induction of EAE with MOG35-55 peptide in WT and *Jmjd3*-deficiency mice. (B) The progression of EAE in *Jmjd3*-

deficiency mice was delayed (as measured by mean clinical scores). (C) A schematic diagram of tumor inoculation and treatment. IFN- $\gamma$  (10ng/ml) pretreated CTIIA overexpression B16 cells were injected to *Rag1*<sup>-/-</sup>*Tyrb*<sup>B-W</sup> mice, then adoptive transfer WT and *Jmjd3* KO TRP-1 CD4 T cells. (D) Digital photograph of tumors at the end of the study (E) Tumor weight was measured from sacrificed mice (n=4, paired t test). (F) Frequency of adoptive transferred TRP-1 CD4 T cells in the tumor infiltrating lymphocytes. (n=4, paired t test). \*  $P < 0.05$ , \*\*  $P < 0.01$

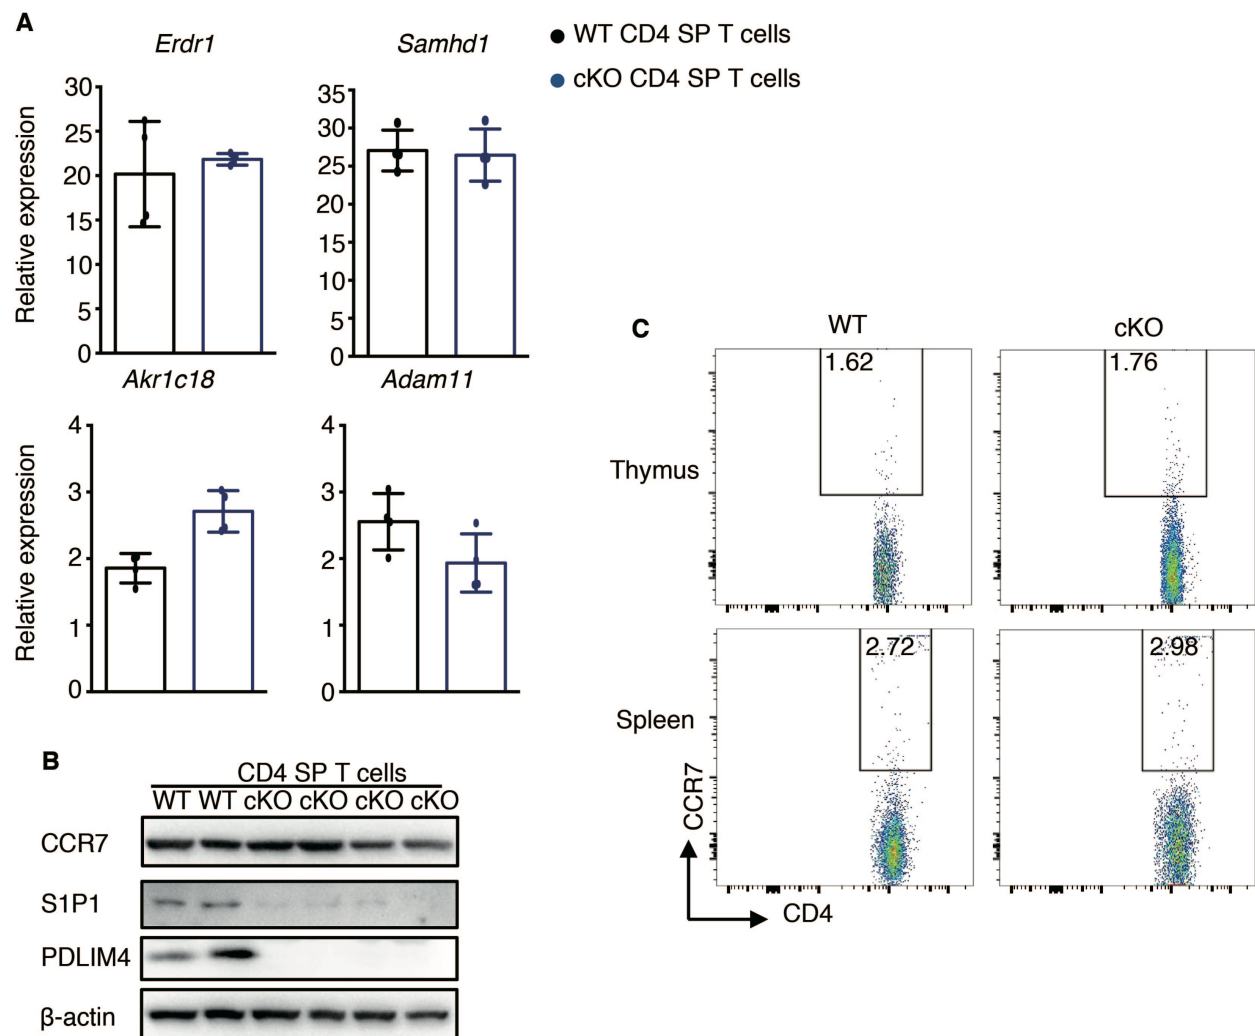

**Supplemental Figure 2.** (A) Real-time PCR analysis of genes analyzed in WT and *Jmjd3* cKO thymic CD4 SP T cells. Expression levels are given as the ratio of the target gene to the control gene to correct

for variations in the starting amount of mRNA (gene/Gapdh x1000). The data are presented as means  $\pm$  SD from three independent experiments. (B) CD4 SP T cells were isolated from WT and *Jmjd3* cKO mice thymuses. CCR7 and PDLIM4 protein levels were detected by immunoblotting using indicated antibodies. (C) Analysis of CCR7 in thymus and spleen CD4 SP T cells from WT and *Jmjd3* cKO mice by flow cytometry.

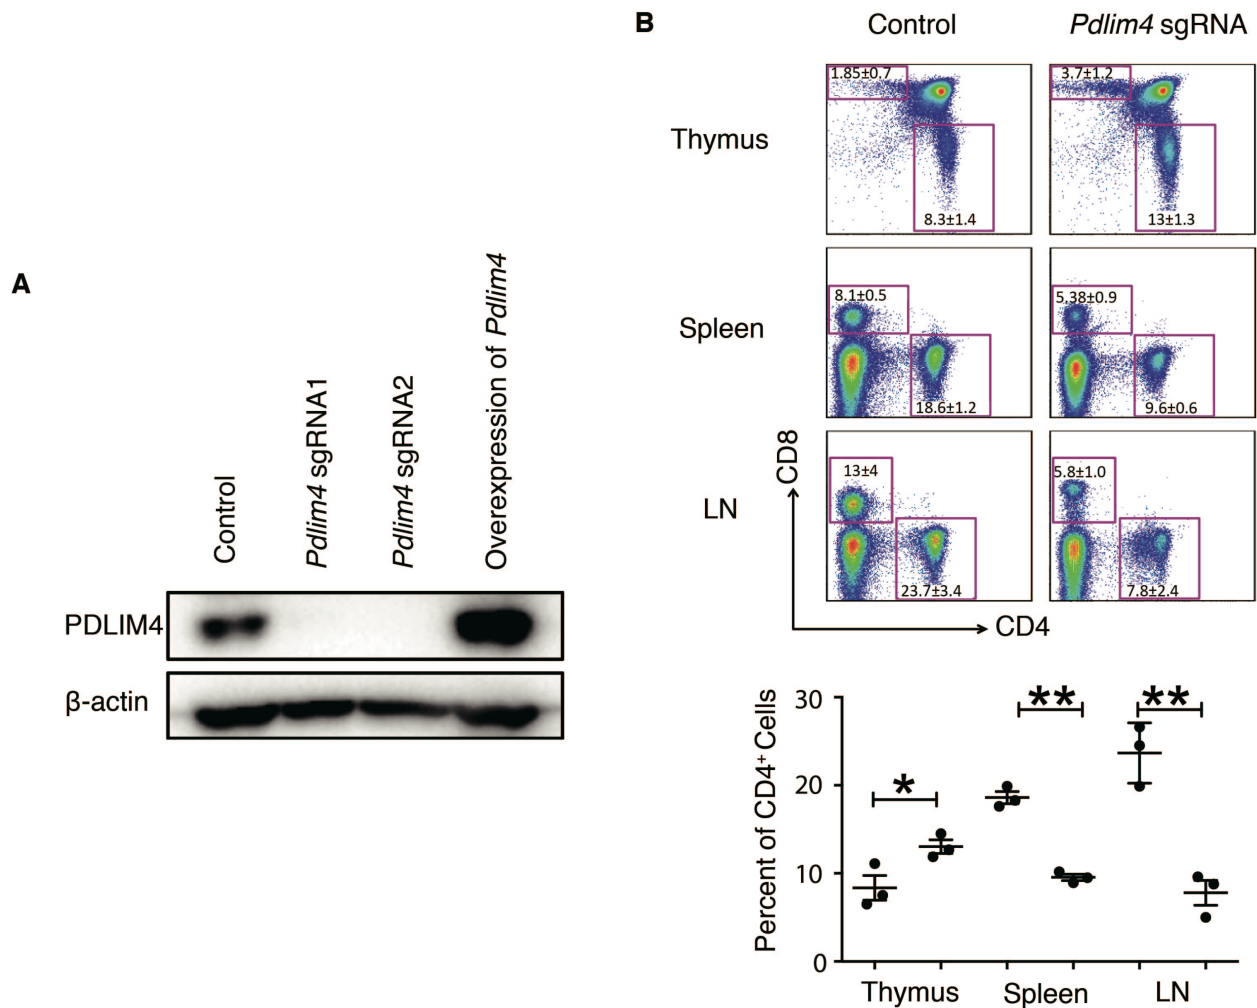

**Supplemental Figure 3.** (A) Knockout efficiency of *Pdlim4* sgRNA1 and sgRNA2 CD4<sup>+</sup> T cells was evaluated by immunoblotting using anti-Pdlim4 antibody.  $\alpha$ -actin was used as a loading control. (B) Flow

cytometric analysis of CD4<sup>+</sup> and CD8<sup>+</sup> T cells isolated from thymus, spleens, and LNs of C57BL/6 chimeric mice transplanted with WT and *Pdlim4* sgRNA knockout bone marrow cells. The data are presented as means ± SD from three independent experiments. Asterisks indicate significant differences between groups (\**P* < 0.05, \*\**P* < 0.01, determined by Student's t test).

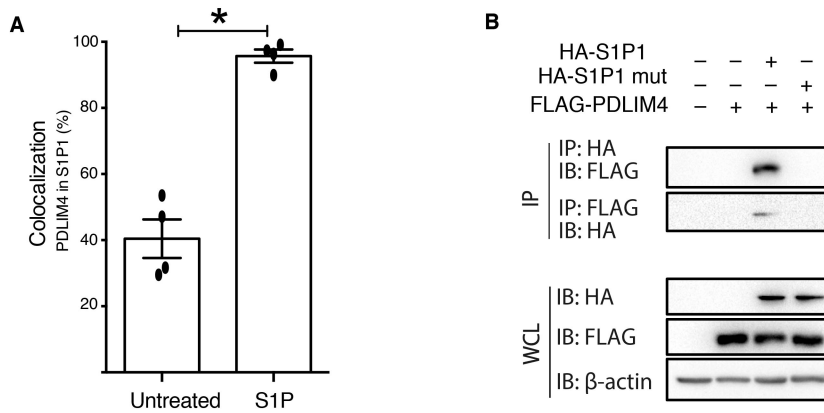

**Supplemental Figure 4.** (A) Confocal microscopy analysis of colocalization of S1P1 with PDLIM4 in untreated and S1P treated CD4<sup>+</sup> T cells (\**P* < 0.05, determined by Student's t test). (B) 293T cells were co-transfected with HA-*S1p1* or HA-C-terminal mutated *S1p1* along with FLAG-*Pdlim4*. Whole cell lysates (WCLs) were immunoprecipitated with anti-HA or anti-FLAG beads and immunoblotted with anti-FLAG-HRP or anti-HA-HRP antibody.

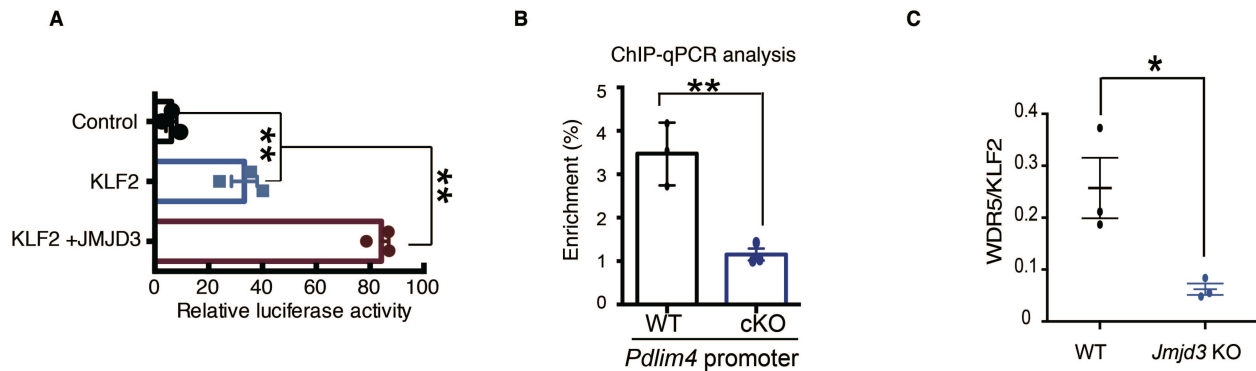

**Supplemental Figure 5.** (A) 1.6K *Pdlim4* promoter were cloned into the episomal luciferase vector, and then were co-transfected with *Klf2* and *Jmjd3* into CD4<sup>+</sup> T cells. The data are presented as means  $\pm$  SD from three independent experiments. **\*\* $P < 0.01$** , by 1-way ANOVA with Tukey's multiple comparisons test. (B) ChIP-qPCR analysis of the % enrichment of KLF2 binding to the *Pdlim4* promoter in WT and *Jmjd3* cKO CD4 SP T cells. (C) KLF2 band and WDR5 band from KLF2 IP experiment quantified by Image J. The data are presented as means  $\pm$  SD from three independent experiments. Asterisks indicate significant differences between groups (**\* $P < 0.05$** , **\*\* $P < 0.01$** , as determined by Student's t test).

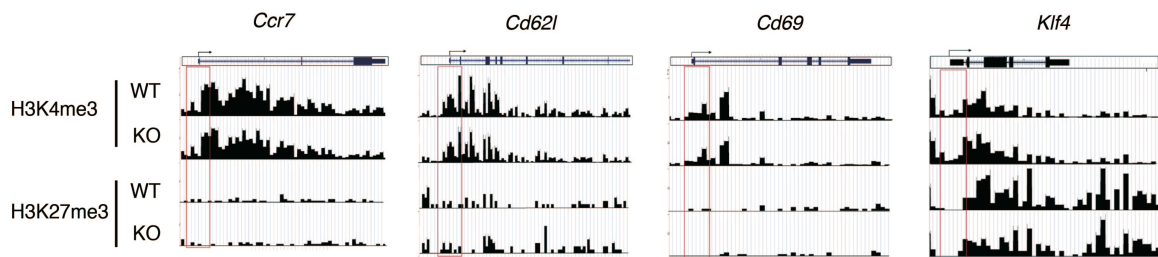

**Supplemental Figure 6.** ChIP-seq analysis the H3K27me3 and H3K4me3 levels of *Ccr7*, *Cd62l*, *Cd69*, and *Klf4* in WT and *Jmjd3* cKO CD4 SP T cells. A 1-kb region around the TSS is indicated in a red box. 10 kb region is analyzed.

Supplemental Figure 7

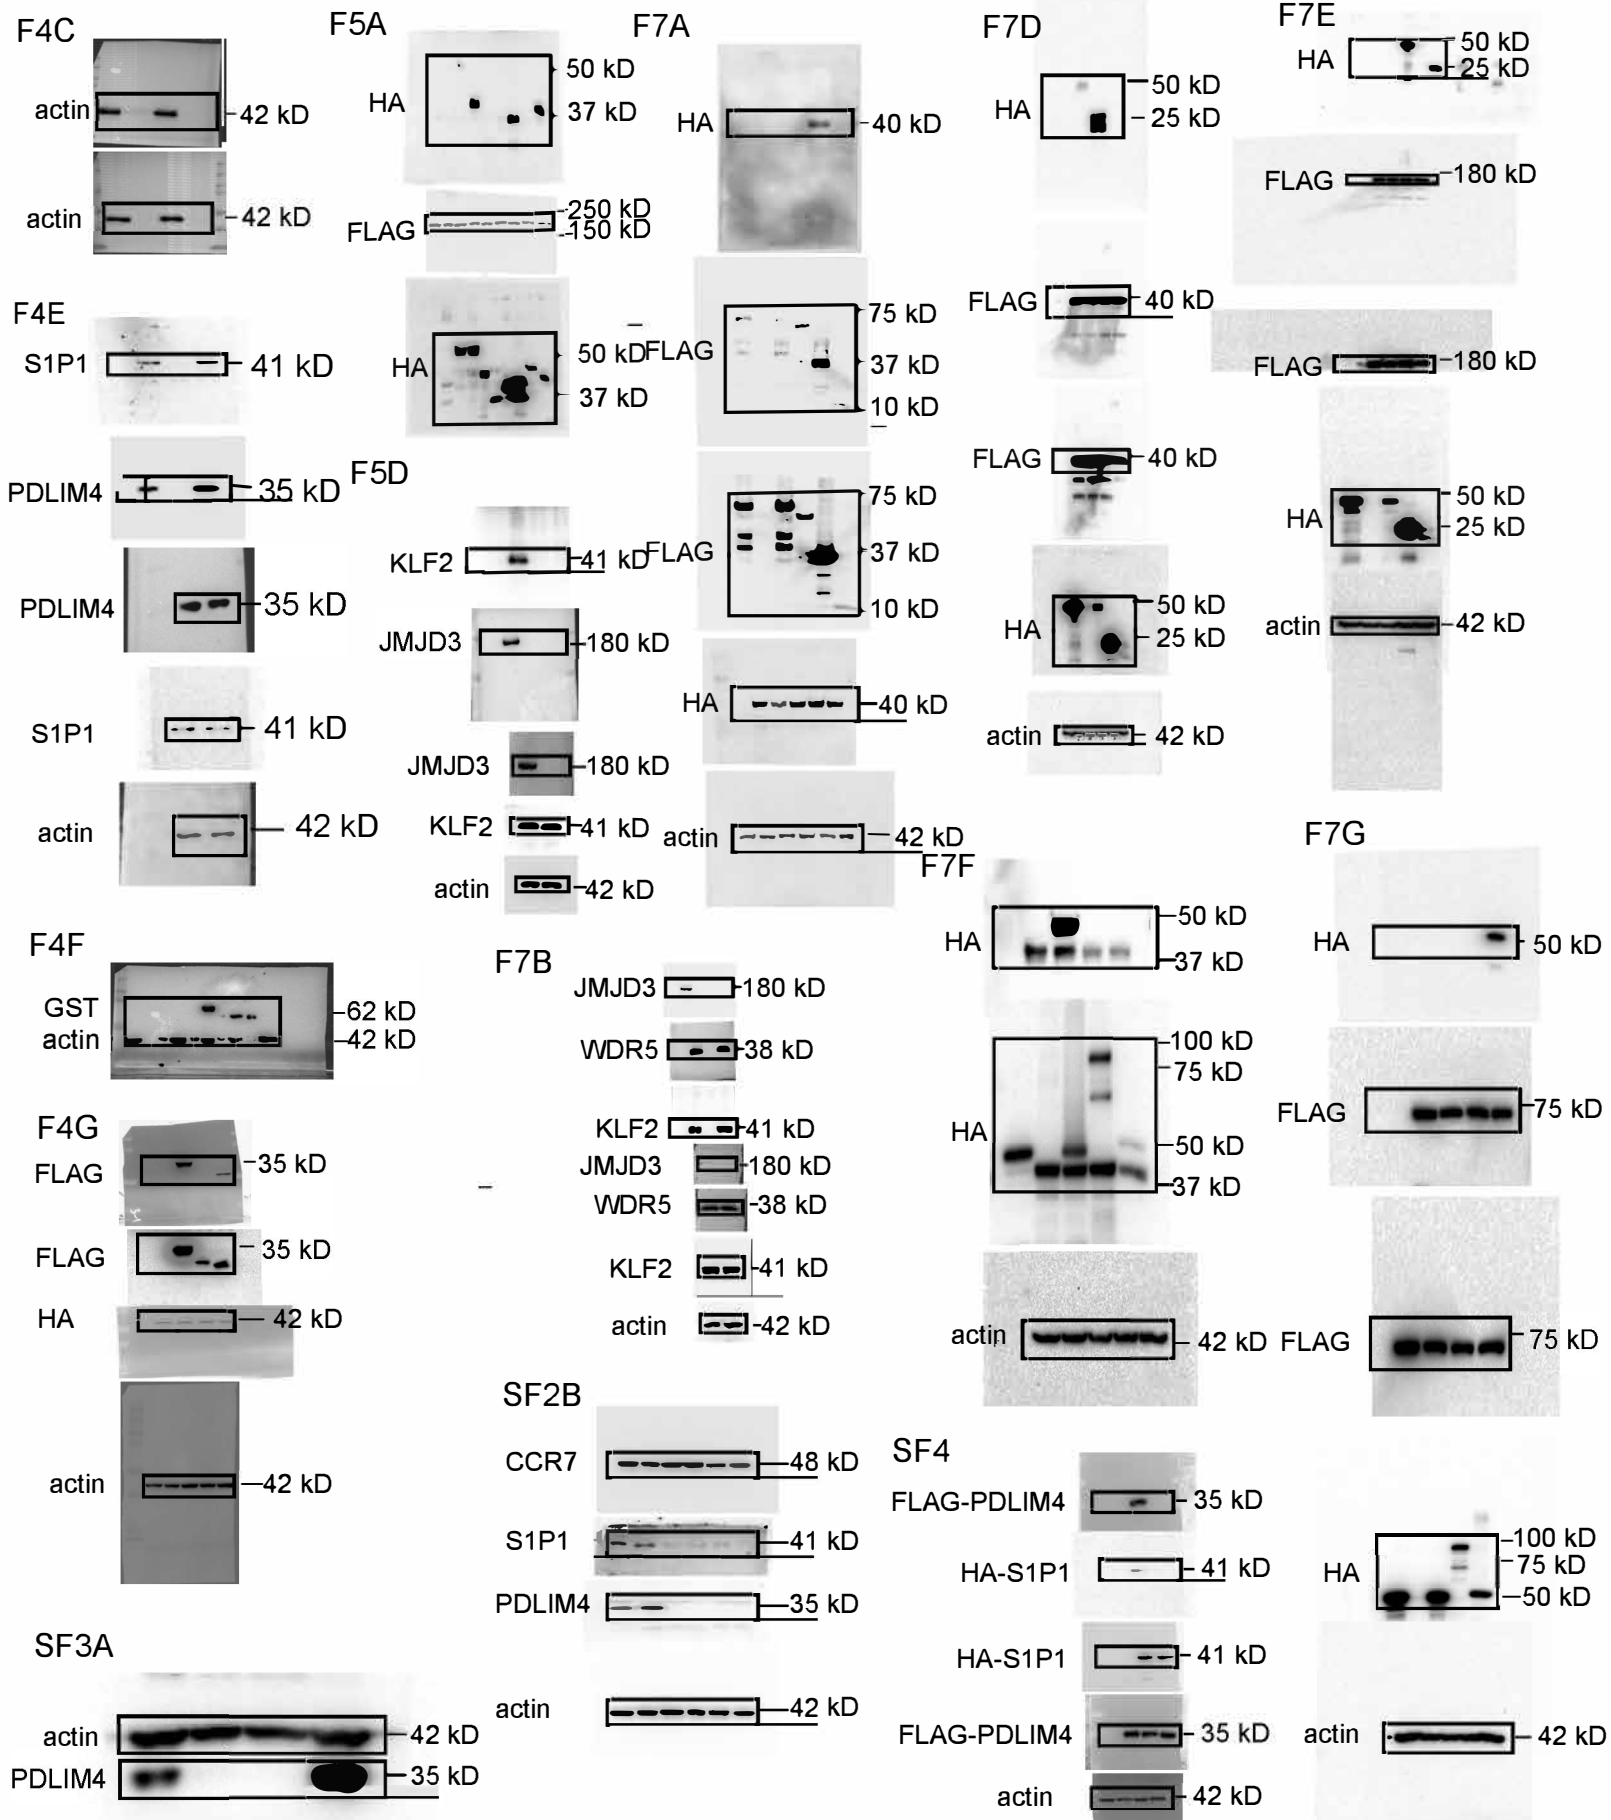

**Supplemental Table 1. Microarray assay of gene expression in WT and Jmjd3-deficiency CD4 SP T cells**

| <b>geneSymbol</b>    | <b>refseq_ID</b> | <b>avg_WT</b> | <b>avg_KO</b> | <b>logRatio_KO/WT</b> | <b>pValue</b> | <b>adj_pValue</b> |
|----------------------|------------------|---------------|---------------|-----------------------|---------------|-------------------|
| <i>Pdlim4</i>        | NM_019417.2      | 9.688         | 7.32          | -2.368                | 0             | 0.04              |
| <i>Igfbp4</i>        | NM_010517.2      | 12.346        | 10.559        | -1.787                | 0             | 0.171             |
| <i>Amigo2</i>        | NM_178114.3      | 11.44         | 9.798         | -1.642                | 0             | 0.024             |
| <i>Igfbp4</i>        | NM_010517.3      | 12.793        | 11.2          | -1.593                | 0             | 0.049             |
| <i>Myo6</i>          | NM_001039546.1   | 9.748         | 8.171         | -1.577                | 0             | 0.043             |
| <i>Lgals1</i>        | NM_008495.1      | 10.455        | 9.036         | -1.419                | 0.002         | 0.254             |
| <i>Ccnd2</i>         | NM_009829.3      | 12.39         | 11.116        | -1.274                | 0             | 0.04              |
| <i>Erdr1</i>         | NM_133362.1      | 11.206        | 9.98          | -1.226                | 0             | 0.153             |
| <i>Samhd1</i>        | NM_018851.2      | 11.708        | 10.488        | -1.219                | 0.001         | 0.236             |
| <i>Akr1c18</i>       | NM_134066.2      | 8.96          | 7.759         | -1.201                | 0             | 0.04              |
| <i>Erdr1</i>         | NM_133362.2      | 10.22         | 9.031         | -1.189                | 0.001         | 0.186             |
| <i>Prlr</i>          | NM_011169.4      | 8.737         | 7.58          | -1.158                | 0             | 0.153             |
| <i>E2f2</i>          | NM_177733.2      | 9.757         | 8.607         | -1.149                | 0.005         | 0.338             |
| <i>Zfp608</i>        | NM_175751.3      | 8.487         | 7.357         | -1.129                | 0             | 0.165             |
| <i>Uhrf1</i>         | NM_010931.2      | 9.638         | 8.516         | -1.121                | 0             | 0.087             |
| <i>E2f2</i>          | NM_177733.2      | 9.812         | 8.757         | -1.055                | 0             | 0.078             |
| <i>Lgals3</i>        | NM_010705.2      | 9.219         | 8.225         | -0.995                | 0.002         | 0.254             |
| <i>Pla2g4f</i>       | NM_001024145.1   | 9.056         | 8.145         | -0.911                | 0             | 0.147             |
| <i>Cd44</i>          | NM_001039150.1   | 9.45          | 8.589         | -0.861                | 0             | 0.123             |
| <i>E430002D04Rik</i> | NM_172909.1      | 8.044         | 7.203         | -0.841                | 0.001         | 0.244             |
| <i>Csprs</i>         | NM_033616.3      | 7.913         | 7.085         | -0.829                | 0.003         | 0.293             |
| <i>Ckb</i>           | NM_021273.3      | 13.314        | 12.5          | -0.814                | 0.001         | 0.202             |
| <i>E2f1</i>          | NM_007891.3      | 8.405         | 7.6           | -0.805                | 0.001         | 0.243             |
| <i>LOC666403</i>     | XR_034389.1      | 13.332        | 12.538        | -0.794                | 0             | 0.153             |
| <i>Top2a</i>         | NM_011623.1      | 8.159         | 7.365         | -0.794                | 0.002         | 0.25              |
| <i>Lmna</i>          | NM_019390.1      | 10.092        | 9.299         | -0.792                | 0.001         | 0.199             |
| <i>Nudt6</i>         | NM_153561.2      | 8.225         | 7.449         | -0.776                | 0             | 0.075             |
| <i>Nrn1</i>          | NM_153529.1      | 7.838         | 7.087         | -0.751                | 0.003         | 0.287             |



|                      |                |        |        |        |       |       |
|----------------------|----------------|--------|--------|--------|-------|-------|
| <i>LOC270152</i>     | XM_194453.3    | 8.444  | 7.694  | -0.75  | 0.001 | 0.172 |
| <i>Cdca7</i>         | NM_025866.3    | 10.241 | 9.518  | -0.723 | 0.001 | 0.25  |
| <i>Lmna</i>          | NM_019390.1    | 9.638  | 8.928  | -0.71  | 0     | 0.153 |
| <i>Arhgap20</i>      | NM_175535.3    | 9.682  | 8.991  | -0.691 | 0     | 0.155 |
| <i>Ddit4</i>         | NM_029083.1    | 10.941 | 10.254 | -0.687 | 0     | 0.127 |
| <i>Gramd4</i>        | NM_172611.2    | 8.127  | 7.444  | -0.682 | 0.004 | 0.297 |
| <i>LOC100041103</i>  | XM_001476013.1 | 10.965 | 10.286 | -0.679 | 0.002 | 0.268 |
| <i>Rora</i>          | NM_013646.1    | 8.961  | 8.285  | -0.676 | 0.009 | 0.387 |
| <i>Myl4</i>          | NM_010858.4    | 8.647  | 7.972  | -0.675 | 0.001 | 0.192 |
| <i>Lmna</i>          | NM_001002011.1 | 9.24   | 8.571  | -0.669 | 0.001 | 0.193 |
| <i>Mki67</i>         | XM_001000692.2 | 7.707  | 7.051  | -0.656 | 0     | 0.098 |
| <i>Inpp1</i>         | NM_010567.1    | 8.179  | 7.529  | -0.65  | 0.002 | 0.258 |
| <i>Mmp9</i>          | NM_013599.2    | 7.891  | 7.251  | -0.64  | 0.001 | 0.226 |
| <i>Mcm10</i>         | NM_027290.1    | 7.7    | 7.061  | -0.638 | 0.003 | 0.294 |
| <i>Tyms</i>          | NM_021288.3    | 8.756  | 8.12   | -0.636 | 0     | 0.098 |
| <i>F13a1</i>         | NM_028784.2    | 8.96   | 8.327  | -0.633 | 0.001 | 0.181 |
| <i>Zfp467</i>        | NM_001085416.1 | 8.978  | 8.347  | -0.631 | 0.006 | 0.355 |
| <i>Il18r1</i>        | NM_008365.1    | 9.054  | 8.43   | -0.624 | 0.009 | 0.386 |
| <i>Tesc</i>          | NM_021344.2    | 10.001 | 9.382  | -0.62  | 0.006 | 0.345 |
| <i>LOC100046855</i>  | XM_001476916.1 | 9.82   | 9.203  | -0.618 | 0.023 | 0.499 |
| <i>Rassf3</i>        | NM_138956.3    | 9.378  | 8.777  | -0.602 | 0     | 0.087 |
| <i>Dtx1</i>          | NM_008052.3    | 9.037  | 8.436  | -0.601 | 0.006 | 0.343 |
| <i>Cd7</i>           | NM_009854.1    | 8.102  | 7.501  | -0.6   | 0     | 0.042 |
| <i>E130016E03Rik</i> | NM_001039556.2 | 7.769  | 7.169  | -0.6   | 0.007 | 0.361 |
| <i>Lig1</i>          | NM_010715.2    | 8.752  | 8.157  | -0.595 | 0.003 | 0.284 |
| <i>Lmna</i>          | NM_019390.1    | 9.082  | 8.49   | -0.591 | 0.02  | 0.485 |
| <i>Cish</i>          | NM_009895.3    | 10.801 | 10.221 | -0.58  | 0.001 | 0.173 |
| <i>Mmp14</i>         | NM_008608.2    | 8.058  | 7.488  | -0.571 | 0     | 0.081 |
| <i>1110017D15Rik</i> | NM_028624.1    | 7.698  | 7.147  | -0.551 | 0.001 | 0.24  |
| <i>Sidt1</i>         | NM_198034.2    | 9.759  | 9.211  | -0.548 | 0     | 0.171 |
| <i>Clspn</i>         | NM_175554.3    | 7.953  | 7.413  | -0.54  | 0.002 | 0.254 |

|                     |                |        |        |        |       |       |
|---------------------|----------------|--------|--------|--------|-------|-------|
| <i>Hist1h2ah</i>    | NM_175659.1    | 11.343 | 10.802 | -0.54  | 0.011 | 0.407 |
| <i>Hist1h2ah</i>    | NM_175659.1    | 11.573 | 11.042 | -0.531 | 0.001 | 0.199 |
| <i>LOC100046608</i> | XM_001476583.1 | 11.146 | 10.617 | -0.529 | 0.003 | 0.293 |
| <i>Gpr83</i>        | NM_010287.2    | 11.011 | 10.485 | -0.526 | 0.012 | 0.429 |
| <i>Bcl2</i>         | NM_009741.2    | 10.493 | 9.97   | -0.523 | 0.002 | 0.259 |
| <i>Tcf19</i>        | NM_025674.1    | 9.035  | 8.514  | -0.521 | 0.001 | 0.24  |
| <i>Glrx</i>         | NM_053108.2    | 10.441 | 9.92   | -0.521 | 0.002 | 0.254 |
| <i>Tomm22</i>       | NM_172609.3    | 10.677 | 10.162 | -0.515 | 0.01  | 0.397 |
| <i>Birc5</i>        | NM_009689.1    | 7.671  | 7.157  | -0.514 | 0     | 0.098 |
| <i>Lad1</i>         | NM_133664.2    | 8.464  | 7.949  | -0.514 | 0.035 | 0.554 |
| <i>Cacnb3</i>       | NM_007581.2    | 8.372  | 7.864  | -0.508 | 0     | 0.04  |
| <i>Capn2</i>        | NM_009794.1    | 9.194  | 8.687  | -0.507 | 0.001 | 0.237 |
| <i>Hist1h2ak</i>    | NM_178183.1    | 11.527 | 11.021 | -0.507 | 0.002 | 0.257 |
| <i>Trat1</i>        | NM_198297.3    | 11.36  | 10.855 | -0.505 | 0.003 | 0.293 |
| <i>Hist1h2ao</i>    | NM_178185.1    | 13.464 | 12.96  | -0.504 | 0     | 0.098 |
| <i>Asb2</i>         | NM_023049.1    | 9.542  | 9.039  | -0.504 | 0.001 | 0.194 |
| <i>Cd44</i>         | NM_001039150.1 | 8.116  | 7.614  | -0.502 | 0.001 | 0.193 |
| <i>H2-T10</i>       | NM_010395.5    | 11.473 | 10.971 | -0.502 | 0.009 | 0.394 |
| <i>Chaf1a</i>       | NM_013733.3    | 7.782  | 7.282  | -0.5   | 0.001 | 0.242 |
| <i>Gpc1</i>         | NM_016696.3    | 10.253 | 9.759  | -0.495 | 0     | 0.157 |
| <i>Hist1h2ai</i>    | NM_178182.1    | 12.442 | 11.952 | -0.491 | 0.003 | 0.281 |
| <i>Tyms-ps</i>      | NR_000040.1    | 8.207  | 7.716  | -0.491 | 0.01  | 0.399 |
| <i>Trat1</i>        | NM_198297.3    | 10.175 | 9.689  | -0.486 | 0.002 | 0.259 |
| <i>Mapk11</i>       | NM_011161.4    | 10.603 | 10.118 | -0.485 | 0.001 | 0.173 |
| <i>Tnfrsf9</i>      | NM_011612.2    | 8.705  | 8.221  | -0.485 | 0.007 | 0.362 |
| <i>Inpp1</i>        | NM_010567.1    | 8.016  | 7.532  | -0.484 | 0.002 | 0.268 |
| <i>Mcm6</i>         | NM_008567.1    | 9.711  | 9.229  | -0.483 | 0.002 | 0.254 |
| <i>Rec8</i>         | NM_020002.2    | 7.599  | 7.118  | -0.481 | 0.007 | 0.366 |
| <i>Tnfrsf9</i>      | NM_011612.2    | 8.357  | 7.877  | -0.48  | 0.01  | 0.397 |
| <i>Birc5</i>        | NM_009689.2    | 7.824  | 7.344  | -0.48  | 0.013 | 0.438 |
| <i>Tgfbr3</i>       | NM_011578.2    | 10.435 | 9.957  | -0.477 | 0.002 | 0.251 |

|                      |                |        |        |        |       |       |
|----------------------|----------------|--------|--------|--------|-------|-------|
| <i>2510009E07Rik</i> | NM_001001881.1 | 9.611  | 9.134  | -0.477 | 0.003 | 0.293 |
| <i>Mansc1</i>        | NM_026345.2    | 8.618  | 8.143  | -0.476 | 0.002 | 0.258 |
| <i>Hist1h2ad</i>     | NM_178188.3    | 11.562 | 11.085 | -0.476 | 0.006 | 0.345 |
| <i>Acpl2</i>         | NM_153420.2    | 10.051 | 9.576  | -0.475 | 0.001 | 0.193 |
| <i>Btbd14a</i>       | NM_001037098.1 | 7.969  | 7.496  | -0.473 | 0     | 0.153 |
| <i>Rasgrp4</i>       | NM_145149.3    | 7.982  | 7.511  | -0.471 | 0.004 | 0.316 |
| <i>Mcm5</i>          | NM_008566.2    | 11.155 | 10.686 | -0.469 | 0.001 | 0.184 |
| <i>Lmna</i>          | NM_019390.1    | 8.267  | 7.798  | -0.469 | 0.003 | 0.281 |
| <i>H2-T10</i>        | NM_010395.2    | 12.507 | 12.038 | -0.469 | 0.006 | 0.359 |
| <i>Hist1h2ag</i>     | NM_178186.2    | 8.505  | 8.038  | -0.467 | 0.008 | 0.381 |
| <i>Appl2</i>         | NM_145220.2    | 9.31   | 8.843  | -0.466 | 0.001 | 0.193 |
| <i>Hist1h2af</i>     | NM_175661.1    | 11.991 | 11.525 | -0.466 | 0.004 | 0.308 |
| <i>Tnfrsf25</i>      | NM_033042.3    | 9.732  | 9.269  | -0.463 | 0.001 | 0.193 |
| <i>LOC381738</i>     | XM_355721.1    | 7.646  | 7.184  | -0.462 | 0.001 | 0.196 |
| <i>Prc1</i>          | NM_145150.1    | 8.091  | 7.633  | -0.457 | 0.003 | 0.293 |
| <i>Gpr97</i>         | NM_173036.2    | 9.349  | 8.893  | -0.456 | 0.013 | 0.432 |
| <i>Hist1h2ad</i>     | NM_178188.3    | 13.139 | 12.685 | -0.454 | 0.002 | 0.261 |
| <i>Clspn</i>         | NM_175554.3    | 7.77   | 7.319  | -0.452 | 0.008 | 0.379 |
| <i>2810001G20Rik</i> | XM_001476904.1 | 10.355 | 9.904  | -0.451 | 0.005 | 0.336 |
| <i>Glo1</i>          | NM_025374.2    | 11.615 | 11.167 | -0.448 | 0     | 0.125 |
| <i>3830406C13Rik</i> | NM_178141.2    | 8.3    | 7.853  | -0.447 | 0.002 | 0.254 |
| <i>Gpr97</i>         | NM_173036.2    | 9.252  | 8.805  | -0.447 | 0.004 | 0.297 |
| <i>Capn2</i>         | NM_009794.2    | 9.48   | 9.034  | -0.446 | 0.01  | 0.407 |
| <i>Foxo1</i>         | NM_019739.2    | 11.182 | 10.738 | -0.444 | 0.001 | 0.178 |
| <i>Atf4</i>          | NM_009716.2    | 11.314 | 10.871 | -0.443 | 0.001 | 0.217 |
| <i>Capn2</i>         | NM_009794.2    | 9.399  | 8.956  | -0.443 | 0.002 | 0.254 |
| <i>LOC381000</i>     | XM_354911.1    | 8.287  | 7.847  | -0.44  | 0.004 | 0.3   |
| <i>Mllt4</i>         | NM_010806.1    | 9.062  | 8.625  | -0.437 | 0     | 0.153 |
| <i>2810417H13Rik</i> | NM_026515.2    | 7.589  | 7.154  | -0.436 | 0.001 | 0.173 |
| <i>Abhd7</i>         | NM_001001804.1 | 7.831  | 7.395  | -0.436 | 0.001 | 0.236 |
| <i>Sp6</i>           | NM_031183.1    | 8.365  | 7.93   | -0.435 | 0.002 | 0.258 |

|                      |                |        |        |        |       |       |
|----------------------|----------------|--------|--------|--------|-------|-------|
| <i>Nmral1</i>        | NM_026393.1    | 8.224  | 7.789  | -0.434 | 0.006 | 0.342 |
| <i>Itm2a</i>         | NM_008409.2    | 13.948 | 13.517 | -0.431 | 0.001 | 0.225 |
| <i>Mcm3</i>          | NM_008563.2    | 8.601  | 8.169  | -0.431 | 0.004 | 0.299 |
| <i>F2rl3</i>         | NM_007975.3    | 8.042  | 7.612  | -0.43  | 0.007 | 0.364 |
| <i>Hist1h2an</i>     | NM_178184.1    | 11.536 | 11.107 | -0.429 | 0.01  | 0.397 |
| <i>Klhdc2</i>        | NM_027117.1    | 12.175 | 11.748 | -0.427 | 0     | 0.042 |
| <i>Litaf</i>         | NM_019980.1    | 10.504 | 10.077 | -0.427 | 0     | 0.098 |
| <i>Pdgfb</i>         | NM_011057.2    | 7.812  | 7.385  | -0.427 | 0.002 | 0.271 |
| <i>Hmgn3</i>         | NM_175074.1    | 9.931  | 9.505  | -0.426 | 0.006 | 0.342 |
| <i>Amica1</i>        | NM_001005421.3 | 7.941  | 7.517  | -0.424 | 0     | 0.153 |
| <i>Acot7</i>         | NM_133348.1    | 11.155 | 10.731 | -0.423 | 0.005 | 0.328 |
| <i>1190002F15Rik</i> |                | 7.787  | 7.369  | -0.419 | 0.002 | 0.25  |
| <i>Acot7</i>         | NM_133348.1    | 9.347  | 8.929  | -0.418 | 0.001 | 0.246 |
| <i>Acvrl1</i>        | NM_009612.2    | 7.699  | 7.281  | -0.418 | 0.002 | 0.254 |
| <i>Adam15</i>        | NM_009614.2    | 8.662  | 8.245  | -0.418 | 0.008 | 0.381 |
| <i>S100a13</i>       | NM_009113.3    | 9.787  | 9.37   | -0.417 | 0.007 | 0.366 |
| <i>Aqp9</i>          | NM_022026.2    | 8.54   | 8.122  | -0.417 | 0.008 | 0.372 |
| <i>Birc5</i>         | NM_009689.2    | 7.484  | 7.068  | -0.416 | 0.001 | 0.236 |
| <i>Sec61b</i>        | NM_024171.1    | 8.909  | 8.493  | -0.415 | 0.017 | 0.464 |
| <i>Anxa2</i>         | NM_007585.3    | 10.235 | 9.822  | -0.413 | 0     | 0.166 |
| <i>LOC100046608</i>  | XM_001476583.1 | 10.096 | 9.682  | -0.413 | 0.002 | 0.259 |
| <i>Tubb2b</i>        | NM_023716.1    | 10.292 | 9.888  | -0.403 | 0.003 | 0.281 |
| <i>Mapre2</i>        | NM_153058.3    | 8.586  | 8.183  | -0.403 | 0.091 | 0.674 |
| <i>Sp6</i>           | NM_031183.1    | 8.599  | 8.198  | -0.401 | 0.008 | 0.379 |
| <i>Mcm6</i>          | NM_008567.1    | 9.597  | 9.196  | -0.401 | 0.014 | 0.444 |
| <i>Cdca8</i>         | NM_026560.3    | 8.13   | 7.732  | -0.398 | 0.008 | 0.373 |
| <i>Fibcd1</i>        | NM_178887.3    | 8.553  | 8.157  | -0.396 | 0.002 | 0.268 |
| <i>Fas</i>           | NM_007987.1    | 9.824  | 9.428  | -0.396 | 0.009 | 0.388 |
| <i>Lyz</i>           | NM_013590.2    | 9.196  | 8.801  | -0.395 | 0     | 0.172 |
| <i>Dclk2</i>         | NM_027539.3    | 8.654  | 8.259  | -0.395 | 0.001 | 0.208 |
| <i>Axl</i>           | NM_009465.3    | 9.311  | 8.917  | -0.394 | 0.005 | 0.337 |

|                        |                |        |        |        |       |       |
|------------------------|----------------|--------|--------|--------|-------|-------|
| <i>Ager</i>            | NM_007425.2    | 9.012  | 8.618  | -0.394 | 0.012 | 0.421 |
| <i>Tbc1d1</i>          | NM_019636.2    | 9.034  | 8.641  | -0.393 | 0.004 | 0.318 |
| <i>Gfer</i>            | NM_023040.3    | 10.57  | 10.179 | -0.391 | 0.004 | 0.297 |
| <i>BC017643</i>        | NM_144832.1    | 9.255  | 8.868  | -0.387 | 0.003 | 0.281 |
| <i>Rasa1</i>           | NM_013832.3    | 8.313  | 7.926  | -0.387 | 0.006 | 0.346 |
| <i>Gpnmb</i>           | NM_053110.3    | 8.868  | 8.485  | -0.384 | 0.007 | 0.364 |
| <i>Ptgir</i>           | NM_008967.1    | 8.396  | 8.014  | -0.382 | 0.001 | 0.226 |
| <i>LOC100040525</i>    | XR_031953.1    | 9.848  | 9.466  | -0.382 | 0.009 | 0.387 |
| <i>Cdc45l</i>          | NM_009862.1    | 7.705  | 7.326  | -0.379 | 0.002 | 0.26  |
| <i>Klra3</i>           | NM_010648.2    | 7.339  | 6.961  | -0.378 | 0.001 | 0.183 |
| <i>Aim1</i>            | NM_172393.1    | 10.493 | 10.117 | -0.377 | 0.013 | 0.437 |
| <i>Aldh2</i>           | NM_009656.3    | 11.111 | 10.734 | -0.376 | 0.001 | 0.217 |
| <i>Pole</i>            | NM_011132.1    | 7.639  | 7.264  | -0.375 | 0.003 | 0.281 |
| <i>A430093F15Rik</i>   | XR_035341.1    | 11.359 | 10.985 | -0.375 | 0.008 | 0.379 |
| <i>1500031L02Rik</i>   | NM_025892.1    | 10.392 | 10.017 | -0.375 | 0.01  | 0.397 |
| <i>Jmjd3</i>           | NM_001017426.1 | 9.951  | 9.577  | -0.374 | 0.088 | 0.669 |
| <i>Pcbp4</i>           | NM_021567.2    | 10.317 | 9.945  | -0.372 | 0.01  | 0.399 |
| <i>H2-Eb1</i>          | NM_010382.2    | 8.43   | 8.059  | -0.371 | 0.015 | 0.452 |
| <i>Samhd1</i>          | NM_018851.2    | 7.81   | 7.44   | -0.37  | 0.025 | 0.511 |
| <i>Sec61b</i>          | NM_024171.2    | 9.883  | 9.514  | -0.369 | 0.01  | 0.397 |
| <i>Klhdc1</i>          | NM_178253.4    | 9.091  | 8.723  | -0.368 | 0.002 | 0.268 |
| <i>1110038D17Rik</i>   | NM_175133.1    | 10.893 | 10.525 | -0.368 | 0.004 | 0.313 |
| <i>Ifi30</i>           | NM_023065.3    | 9.097  | 8.731  | -0.366 | 0.002 | 0.254 |
| <i>sc10004175.1_57</i> | BC026739.1     | 7.723  | 7.357  | -0.366 | 0.004 | 0.302 |
| <i>Mllt4</i>           | NM_010806.1    | 8.261  | 7.899  | -0.363 | 0     | 0.128 |
| <i>Map3k8</i>          | NM_007746.2    | 8.095  | 7.733  | -0.362 | 0.005 | 0.341 |
| <i>Hectd2</i>          | NM_172637.1    | 9.335  | 8.976  | -0.359 | 0.005 | 0.332 |
| <i>Hap1</i>            | NM_010404.2    | 8.329  | 7.97   | -0.359 | 0.012 | 0.421 |
| <i>Tipin</i>           | NM_025372.1    | 9.836  | 9.478  | -0.358 | 0.027 | 0.518 |
| <i>Ppp3cc</i>          | NM_008915.2    | 9.687  | 9.334  | -0.354 | 0.026 | 0.515 |
| <i>St3gal1</i>         | NM_009177.4    | 9.172  | 8.821  | -0.351 | 0.004 | 0.296 |

|                      |                |        |        |        |       |       |
|----------------------|----------------|--------|--------|--------|-------|-------|
| <i>Irf6</i>          | NM_016851.2    | 8.677  | 8.326  | -0.351 | 0.016 | 0.455 |
| <i>Gng2</i>          | NM_001038637.1 | 8.849  | 8.498  | -0.351 | 0.072 | 0.644 |
| <i>Oasl2</i>         | NM_011854.1    | 9.063  | 8.713  | -0.35  | 0     | 0.128 |
| <i>Bcl2</i>          | NM_177410.2    | 10.874 | 10.524 | -0.35  | 0.03  | 0.531 |
| <i>E2f2</i>          | NM_183301.1    | 7.938  | 7.589  | -0.349 | 0.003 | 0.293 |
| <i>Ncaph</i>         | NM_144818.1    | 8.145  | 7.795  | -0.349 | 0.005 | 0.341 |
| <i>Figl1</i>         | NM_021891.2    | 7.396  | 7.047  | -0.349 | 0.011 | 0.41  |
| <i>Itgb7</i>         | NM_013566.1    | 11.779 | 11.43  | -0.348 | 0     | 0.139 |
| <i>Anxa6</i>         | NM_013472.2    | 12.938 | 12.59  | -0.347 | 0.004 | 0.308 |
| <i>Nt5e</i>          | NM_011851.2    | 8.357  | 8.013  | -0.344 | 0.021 | 0.492 |
| <i>Saps3</i>         | NM_029456.1    | 10.929 | 10.586 | -0.343 | 0.007 | 0.366 |
| <i>Tk1</i>           | NM_009387.1    | 7.345  | 7.001  | -0.343 | 0.035 | 0.554 |
| <i>LOC100047579</i>  | XM_001478437.1 | 9.291  | 8.95   | -0.342 | 0     | 0.158 |
| <i>Acot7</i>         | NM_133348.1    | 9.161  | 8.82   | -0.341 | 0     | 0.098 |
| <i>Rrm1</i>          | NM_009103.2    | 8.693  | 8.351  | -0.341 | 0.003 | 0.293 |
| <i>LOC100046608</i>  | XM_001476583.1 | 9.11   | 8.768  | -0.341 | 0.033 | 0.546 |
| <i>2900062L11Rik</i> | NR_003642.1    | 9.483  | 9.144  | -0.34  | 0.019 | 0.478 |
| <i>Fdps</i>          | NM_134469.3    | 10.151 | 9.813  | -0.339 | 0.014 | 0.447 |
| <i>Whsc1</i>         | XM_898312.2    | 8.011  | 7.673  | -0.337 | 0.003 | 0.281 |
| <i>Il6ra</i>         | NM_010559.2    | 8.713  | 8.376  | -0.337 | 0.017 | 0.462 |
| <i>Klrd1</i>         | NM_010654.2    | 7.532  | 7.196  | -0.336 | 0.003 | 0.281 |
| <i>Qpct</i>          | NM_027455.1    | 7.996  | 7.661  | -0.335 | 0.001 | 0.244 |
| <i>Cchr1</i>         | NM_146248.1    | 8.545  | 8.211  | -0.335 | 0.011 | 0.409 |
| <i>Acot7</i>         | NM_133348.1    | 8.707  | 8.372  | -0.335 | 0.044 | 0.585 |
| <i>Garnl4</i>        | NM_001015046.2 | 7.831  | 7.497  | -0.334 | 0.003 | 0.293 |
| <i>Hist1h2ai</i>     | NM_178182.1    | 13.209 | 12.874 | -0.334 | 0.005 | 0.328 |
| <i>H1f0</i>          | NM_008197.3    | 7.471  | 7.137  | -0.334 | 0.018 | 0.47  |
| <i>Ccrn4l</i>        | NM_009834.1    | 9.469  | 9.136  | -0.333 | 0     | 0.049 |
| <i>Cdca3</i>         | NM_013538.4    | 8.018  | 7.686  | -0.332 | 0.003 | 0.293 |
| <i>Rad54l</i>        | NM_009015.2    | 7.454  | 7.122  | -0.332 | 0.018 | 0.477 |
| <i>AI467606</i>      | NM_178901.3    | 11.395 | 11.064 | -0.331 | 0.001 | 0.211 |

|                      |                |        |        |        |       |       |
|----------------------|----------------|--------|--------|--------|-------|-------|
| <i>Mcm6</i>          | NM_008567.1    | 9.897  | 9.567  | -0.331 | 0.032 | 0.541 |
| <i>Tnfrsf18</i>      | NM_009400.2    | 11.519 | 11.189 | -0.33  | 0.006 | 0.343 |
| <i>S100a8</i>        | NM_013650.2    | 7.207  | 6.878  | -0.329 | 0.001 | 0.173 |
| <i>Trappc1</i>       | NM_001024206.1 | 10.118 | 9.789  | -0.329 | 0.001 | 0.202 |
| <i>Xcl1</i>          | NM_008510.1    | 7.547  | 7.218  | -0.329 | 0.007 | 0.364 |
| <i>Fcgrt</i>         | NM_010189.1    | 7.965  | 7.637  | -0.328 | 0.003 | 0.281 |
| <i>Cox7a2l</i>       | XM_123188.1    | 12.506 | 12.178 | -0.328 | 0.005 | 0.326 |
| <i>2510009E07Rik</i> | NM_001001881.1 | 8.041  | 7.714  | -0.328 | 0.007 | 0.368 |
| <i>Ccr8</i>          | NM_007720.2    | 10.097 | 9.769  | -0.328 | 0.041 | 0.576 |
| <i>Tiam1</i>         | NM_009384.2    | 10.361 | 10.034 | -0.327 | 0.006 | 0.341 |
| <i>Maged2</i>        | NM_030700.1    | 8.976  | 8.649  | -0.326 | 0.011 | 0.41  |
| <i>Kif1b</i>         | NM_008441.2    | 9.132  | 8.806  | -0.326 | 0.023 | 0.499 |
| <i>Psat1</i>         | NM_177420.1    | 10.128 | 9.804  | -0.324 | 0.064 | 0.626 |
| <i>LOC100045677</i>  | XR_031705.1    | 8.623  | 8.301  | -0.323 | 0.002 | 0.253 |
| <i>LOC625360</i>     | NM_001037925.1 | 8.832  | 8.509  | -0.323 | 0.005 | 0.334 |
| <i>Ifitm3</i>        | NM_025378.2    | 8.605  | 8.283  | -0.322 | 0.002 | 0.252 |
| <i>D16Bwg1494e</i>   | XM_358773.6    | 8.374  | 8.053  | -0.321 | 0.022 | 0.495 |
| <i>Lxn</i>           | NM_016753.4    | 9.881  | 9.561  | -0.32  | 0.003 | 0.293 |
| <i>Mrpl33</i>        | NM_025796.2    | 12.452 | 12.132 | -0.32  | 0.01  | 0.406 |
| <i>Lcmt1</i>         | NM_025304.3    | 10.891 | 10.571 | -0.32  | 0.033 | 0.547 |
| <i>LOC100046608</i>  | XM_001476583.1 | 8.695  | 8.375  | -0.32  | 0.033 | 0.546 |
| <i>Vim</i>           | NM_011701.3    | 11.994 | 11.676 | -0.318 | 0.005 | 0.328 |
| <i>Il6ra</i>         | NM_010559.2    | 10.315 | 9.997  | -0.318 | 0.045 | 0.587 |
| <i>Ptms</i>          | NM_026988.1    | 8.186  | 7.87   | -0.316 | 0.013 | 0.434 |
| <i>Rab4a</i>         | NM_009003.2    | 8.112  | 7.796  | -0.316 | 0.014 | 0.44  |
| <i>LOC381770</i>     | XM_355767.1    | 8.149  | 7.835  | -0.315 | 0.002 | 0.254 |
| <i>Hmgn3</i>         | NM_026122.3    | 9.676  | 9.362  | -0.315 | 0.005 | 0.332 |
| <i>Akr1c12</i>       | NM_013777.2    | 9.132  | 8.817  | -0.314 | 0.006 | 0.341 |
| <i>0610007P14Rik</i> | NM_021446.1    | 9.532  | 9.219  | -0.313 | 0.001 | 0.249 |
| <i>Arhgef6</i>       | NM_152801.1    | 11.984 | 11.673 | -0.311 | 0.014 | 0.447 |
| <i>Gins2</i>         | NM_178856.1    | 7.638  | 7.327  | -0.311 | 0.03  | 0.533 |

|                           |                |        |        |        |       |       |
|---------------------------|----------------|--------|--------|--------|-------|-------|
| <i>LOC100040592</i>       | XM_001475189.1 | 11.33  | 11.02  | -0.31  | 0.005 | 0.326 |
| <i>Psme2</i>              | NM_011190.3    | 9.499  | 9.189  | -0.31  | 0.01  | 0.397 |
| <i>Bcor</i>               | NM_029510.1    | 10.18  | 9.871  | -0.309 | 0.006 | 0.358 |
| <i>Zmat3</i>              | NM_009517.2    | 9.129  | 8.819  | -0.309 | 0.065 | 0.628 |
| <i>Gsto1</i>              | NM_010362.2    | 9.823  | 9.516  | -0.307 | 0.002 | 0.265 |
| <i>Hist2h2ac</i>          | NM_175662.1    | 13.389 | 13.082 | -0.307 | 0.007 | 0.365 |
| <i>Fas</i>                | NM_007987.1    | 10.63  | 10.324 | -0.306 | 0.004 | 0.302 |
| <i>Dnahc8</i>             | NM_013811.3    | 9.621  | 9.316  | -0.306 | 0.017 | 0.46  |
| <i>Trappc1</i>            | NM_001024206.1 | 10.48  | 10.175 | -0.306 | 0.025 | 0.509 |
| <i>EG433229</i>           | XM_899874.3    | 11.386 | 11.081 | -0.305 | 0.006 | 0.355 |
| <i>Atn1</i>               | NM_007881.4    | 9.061  | 8.757  | -0.304 | 0.002 | 0.268 |
| <i>Zdhhc15</i>            | NM_175358.2    | 8.316  | 8.012  | -0.304 | 0.003 | 0.289 |
| <i>Cd74</i>               | NM_010545.3    | 9.633  | 9.33   | -0.303 | 0.024 | 0.506 |
| <i>ENSMUSG00000043795</i> | XM_001480835.1 | 13.167 | 12.865 | -0.302 | 0.007 | 0.368 |
| <i>2010001J22Rik</i>      | NM_001013022.1 | 8.198  | 7.896  | -0.302 | 0.012 | 0.421 |
| <i>Sqstm1</i>             | NM_011018.2    | 10.888 | 11.189 | 0.301  | 0.004 | 0.314 |
| <i>Ddx6</i>               | NM_007841.3    | 9.671  | 9.971  | 0.301  | 0.12  | 0.711 |
| <i>BC094916</i>           | NM_001024721.1 | 9.071  | 9.373  | 0.302  | 0.013 | 0.434 |
| <i>Pecam1</i>             | NM_001032378.1 | 8.679  | 8.981  | 0.302  | 0.034 | 0.548 |
| <i>LOC433955</i>          | XR_033167.1    | 11.844 | 12.148 | 0.303  | 0.004 | 0.308 |
| <i>Slc25a25</i>           | NM_146118.2    | 8.966  | 9.268  | 0.303  | 0.03  | 0.531 |
| <i>scI0002975.1_346</i>   | AK088505.1     | 10.127 | 10.43  | 0.303  | 0.089 | 0.671 |
| <i>Btbd11</i>             | NM_001017525.1 | 9.793  | 10.097 | 0.304  | 0.002 | 0.27  |
| <i>Pdcd4</i>              | NM_011050.3    | 11.185 | 11.489 | 0.304  | 0.024 | 0.505 |
| <i>D12Ert551e</i>         | NM_028731.2    | 8.523  | 8.827  | 0.304  | 0.043 | 0.582 |
| <i>Hcn3</i>               | NM_008227.1    | 7.447  | 7.753  | 0.306  | 0.016 | 0.455 |
| <i>H6pd</i>               | NM_173371.3    | 9.417  | 9.724  | 0.307  | 0.001 | 0.228 |
| <i>LOC100043821</i>       | XM_001481017.1 | 9.966  | 10.274 | 0.307  | 0.012 | 0.419 |
| <i>Csde1</i>              | NM_144901.2    | 8.42   | 8.727  | 0.307  | 0.022 | 0.495 |
| <i>EG434404</i>           | XM_486222.5    | 10.709 | 11.016 | 0.307  | 0.134 | 0.726 |
| <i>Wdr51b</i>             | NM_027740.5    | 7.834  | 8.142  | 0.308  | 0.002 | 0.259 |



|                      |                |        |        |       |       |       |
|----------------------|----------------|--------|--------|-------|-------|-------|
| <i>Peli1</i>         | NM_023324.2    | 10.049 | 10.358 | 0.309 | 0.001 | 0.244 |
| <i>LOC624083</i>     | XR_035632.1    | 10.818 | 11.127 | 0.309 | 0.046 | 0.589 |
| <i>2210010C17Rik</i> | NM_027308.2    | 8.143  | 8.454  | 0.311 | 0.001 | 0.244 |
| <i>0610007P22Rik</i> | NM_026676.2    | 7.962  | 8.273  | 0.311 | 0.005 | 0.328 |
| <i>BC022224</i>      | NM_177564.4    | 7.546  | 7.856  | 0.311 | 0.02  | 0.487 |
| <i>LOC667370</i>     | XM_001480084.1 | 8.999  | 9.311  | 0.312 | 0.033 | 0.545 |
| <i>2010308M01Rik</i> | XM_131083.2    | 9.31   | 9.622  | 0.312 | 0.062 | 0.623 |
| <i>Pitpnm2</i>       | NM_011256.1    | 11.158 | 11.471 | 0.313 | 0.012 | 0.417 |
| <i>Eef2</i>          | NM_007907.1    | 11.443 | 11.756 | 0.313 | 0.055 | 0.608 |
| <i>B230342M21Rik</i> | NM_133898.3    | 10.428 | 10.742 | 0.314 | 0.003 | 0.293 |
| <i>Rpl29</i>         | NM_009082.2    | 11.692 | 12.006 | 0.314 | 0.003 | 0.293 |
| <i>Arrdc4</i>        | NM_001042592.2 | 7.92   | 8.235  | 0.315 | 0     | 0.123 |
| <i>Zfp295</i>        | NM_001081684.1 | 8.459  | 8.775  | 0.316 | 0.003 | 0.281 |
| <i>Smpdl3a</i>       | NM_020561.2    | 9.325  | 9.643  | 0.317 | 0.011 | 0.409 |
| <i>Per1</i>          | NM_011065.2    | 11.644 | 11.962 | 0.318 | 0     | 0.153 |
| <i>Cbx7</i>          | NM_144811.3    | 9.705  | 10.023 | 0.318 | 0.01  | 0.397 |
| <i>Gnptg</i>         | NM_172529.3    | 10.705 | 11.023 | 0.318 | 0.015 | 0.45  |
| <i>C030048B08Rik</i> | NM_172991.2    | 9.069  | 9.388  | 0.319 | 0.029 | 0.528 |
| <i>EG382843</i>      | XM_905000.3    | 10.782 | 11.103 | 0.32  | 0.001 | 0.199 |
| <i>Galnt9</i>        | NM_198306.1    | 7.653  | 7.973  | 0.32  | 0.002 | 0.254 |
| <i>Gimap5</i>        | NM_175035.5    | 8.99   | 9.31   | 0.32  | 0.017 | 0.46  |
| <i>Gpr137b-ps</i>    | NR_003568.1    | 7.056  | 7.378  | 0.323 | 0     | 0.157 |
| <i>Xdh</i>           | NM_011723.2    | 7.568  | 7.891  | 0.323 | 0     | 0.078 |
| <i>Psd2</i>          | NM_028707.3    | 7.34   | 7.663  | 0.323 | 0.003 | 0.293 |
| <i>Gimap5</i>        | NM_175035.5    | 8.556  | 8.879  | 0.323 | 0.021 | 0.49  |
| <i>Jun</i>           | NM_010591.1    | 8.236  | 8.56   | 0.324 | 0.001 | 0.244 |
| <i>Rgs11</i>         | XM_128488.3    | 8.769  | 9.093  | 0.324 | 0.003 | 0.293 |
| <i>Inadl</i>         | NM_172696.2    | 7.916  | 8.24   | 0.324 | 0.078 | 0.656 |
| <i>Eef2</i>          | NM_007907.1    | 12.049 | 12.374 | 0.325 | 0.04  | 0.571 |
| <i>Sfxn4</i>         | NM_053198.2    | 7.761  | 8.089  | 0.328 | 0.022 | 0.493 |
| <i>Gprasp1</i>       | NM_001005385.1 | 10.693 | 11.021 | 0.328 | 0.025 | 0.511 |

|                      |                |        |        |       |       |       |
|----------------------|----------------|--------|--------|-------|-------|-------|
| <i>Ifit3</i>         | NM_010501.2    | 8.849  | 9.177  | 0.329 | 0.003 | 0.293 |
| <i>Srfbp1</i>        | NM_026040.2    | 8.475  | 8.804  | 0.329 | 0.023 | 0.5   |
| <i>Rn18s</i>         | NR_003278.1    | 11.008 | 11.339 | 0.331 | 0.019 | 0.478 |
| <i>Oat</i>           | NM_016978.1    | 10.693 | 11.026 | 0.332 | 0.001 | 0.193 |
| <i>Plp1</i>          | NM_011123.2    | 7.647  | 7.981  | 0.334 | 0.047 | 0.591 |
| <i>Smyd3</i>         | NM_027188.3    | 7.854  | 8.19   | 0.336 | 0     | 0.128 |
| <i>Plk3</i>          | NM_013807.1    | 9.732  | 10.069 | 0.336 | 0.011 | 0.407 |
| <i>Egr1</i>          | NM_007913.5    | 13.522 | 13.861 | 0.339 | 0.005 | 0.326 |
| <i>Sdcbp2</i>        | NM_145535.1    | 8.611  | 8.95   | 0.339 | 0.007 | 0.369 |
| <i>LOC100046232</i>  | XM_001475817.1 | 8.518  | 8.858  | 0.34  | 0.02  | 0.487 |
| <i>D12Ertd551e</i>   | NM_028731.5    | 8.683  | 9.023  | 0.34  | 0.028 | 0.522 |
| <i>LOC100045780</i>  | XM_001475019.1 | 9.516  | 9.857  | 0.341 | 0.007 | 0.366 |
| <i>4631423B10Rik</i> | NM_175422.2    | 9.934  | 10.276 | 0.342 | 0.001 | 0.228 |
| <i>Atg16l2</i>       | XM_001476186.1 | 9.509  | 9.851  | 0.342 | 0.006 | 0.349 |
| <i>Ppic</i>          | NM_008908.3    | 7.792  | 8.135  | 0.343 | 0.007 | 0.362 |
| <i>Ggnbp1</i>        | NM_027544.1    | 8.759  | 9.102  | 0.343 | 0.01  | 0.397 |
| <i>Specc1</i>        | NM_001029936.2 | 7.911  | 8.254  | 0.344 | 0.004 | 0.32  |
| <i>Aebp2</i>         | NM_009637.1    | 8.633  | 8.978  | 0.344 | 0.016 | 0.455 |
| <i>Pknox1</i>        | NM_016670.2    | 8.586  | 8.931  | 0.344 | 0.02  | 0.486 |
| <i>Ephx1</i>         | NM_010145.2    | 11.553 | 11.898 | 0.345 | 0     | 0.078 |
| <i>LOC100048331</i>  | XR_034509.1    | 7.517  | 7.863  | 0.345 | 0.011 | 0.408 |
| <i>Tardbp</i>        | NM_001008545.1 | 9.972  | 10.318 | 0.346 | 0.005 | 0.328 |
| <i>lqgap2</i>        | NM_027711.1    | 10.394 | 10.74  | 0.346 | 0.015 | 0.452 |
| <i>LOC100045617</i>  | XM_001474613.1 | 11.826 | 12.173 | 0.347 | 0.002 | 0.258 |
| <i>Tob2</i>          | NM_020507.3    | 10.68  | 11.026 | 0.347 | 0.012 | 0.425 |
| <i>Pknox1</i>        | NM_016670.2    | 8.974  | 9.321  | 0.347 | 0.026 | 0.513 |
| <i>Ifit3</i>         | NM_010501.1    | 11.325 | 11.673 | 0.348 | 0.005 | 0.332 |
| <i>Hsd3b2</i>        | NM_153193.2    | 11.119 | 11.467 | 0.348 | 0.015 | 0.452 |
| <i>Numa1</i>         | NM_133947.2    | 9.026  | 9.375  | 0.349 | 0.035 | 0.554 |
| <i>Rn18s</i>         | NR_003278.1    | 12.645 | 12.994 | 0.349 | 0.046 | 0.589 |
| <i>EG434197</i>      | NM_001013811.2 | 11.372 | 11.722 | 0.35  | 0.012 | 0.421 |

|                      |                |        |        |       |       |       |
|----------------------|----------------|--------|--------|-------|-------|-------|
| <i>LOC384710</i>     | XR_003896.1    | 11.3   | 11.651 | 0.351 | 0.118 | 0.707 |
| <i>Gramd1a</i>       | NM_027898.3    | 8.823  | 9.177  | 0.354 | 0.018 | 0.475 |
| <i>Nfkbib</i>        | NM_010908.3    | 8.5    | 8.855  | 0.355 | 0.011 | 0.41  |
| <i>AI450540</i>      | NM_145505.2    | 10.416 | 10.771 | 0.356 | 0.001 | 0.173 |
| <i>LOC667337</i>     | XM_990977.1    | 9.123  | 9.479  | 0.356 | 0.005 | 0.33  |
| <i>Wdr89</i>         | XM_001479426.1 | 10.385 | 10.742 | 0.357 | 0.094 | 0.677 |
| <i>Ccdc126</i>       | NM_175098.2    | 8.751  | 9.112  | 0.361 | 0.002 | 0.251 |
| <i>Pkp4</i>          | NM_175464.2    | 9.639  | 10     | 0.361 | 0.003 | 0.281 |
| <i>Dap</i>           | NM_146057.1    | 8.729  | 9.09   | 0.361 | 0.022 | 0.493 |
| <i>Ppargc1b</i>      | NM_133249.2    | 9.024  | 9.386  | 0.362 | 0.003 | 0.281 |
| <i>Folr4</i>         | NM_022888.1    | 8.384  | 8.747  | 0.363 | 0     | 0.098 |
| <i>E130012A19Rik</i> | NM_175332.3    | 7.869  | 8.232  | 0.363 | 0.069 | 0.64  |
| <i>4930431B09Rik</i> | XR_002338.2    | 9.304  | 9.668  | 0.364 | 0     | 0.098 |
| <i>Fbxl12</i>        | NM_013911.2    | 8.352  | 8.716  | 0.364 | 0.004 | 0.307 |
| <i>Tcf25</i>         | NM_001037878.1 | 9.679  | 10.043 | 0.364 | 0.015 | 0.452 |
| <i>LOC623121</i>     | XM_001480713.1 | 10.335 | 10.7   | 0.365 | 0.003 | 0.281 |
| <i>Ube2n</i>         | NM_080560.3    | 8.594  | 8.959  | 0.365 | 0.009 | 0.387 |
| <i>H2-Q8</i>         | NM_023124.2    | 9.677  | 10.042 | 0.365 | 0.015 | 0.452 |
| <i>Klf6</i>          | NM_011803.2    | 11.694 | 12.06  | 0.366 | 0.032 | 0.541 |
| <i>LincR</i>         | NM_153408.2    | 7.55   | 7.917  | 0.367 | 0.003 | 0.281 |
| <i>Klf6</i>          | NM_011803.2    | 8.189  | 8.556  | 0.367 | 0.016 | 0.455 |
| <i>LOC630146</i>     | XM_973806.1    | 7.731  | 8.098  | 0.367 | 0.019 | 0.482 |
| <i>Tlr1</i>          | NM_030682.1    | 8.361  | 8.735  | 0.374 | 0.006 | 0.355 |
| <i>Rabac1</i>        | NM_010261.2    | 10.892 | 11.266 | 0.374 | 0.01  | 0.397 |
| <i>Rapgef6</i>       | NM_175258.3    | 8.842  | 9.216  | 0.374 | 0.016 | 0.455 |
| <i>Ifngr1</i>        | NM_010511.2    | 9.765  | 10.144 | 0.379 | 0.024 | 0.505 |
| <i>EG668300</i>      | XM_001000750.1 | 9.736  | 10.117 | 0.38  | 0.053 | 0.606 |
| <i>Gprasp1</i>       | NM_026081.5    | 8.882  | 9.265  | 0.382 | 0.026 | 0.514 |
| <i>Adh1</i>          | NM_007409.2    | 7.967  | 8.351  | 0.384 | 0.016 | 0.455 |
| <i>Asah3l</i>        | NM_139306.1    | 7.849  | 8.234  | 0.385 | 0.006 | 0.346 |
| <i>Adi1</i>          | NM_134052.2    | 10.729 | 11.117 | 0.388 | 0.006 | 0.353 |

|                      |                |        |        |       |       |       |
|----------------------|----------------|--------|--------|-------|-------|-------|
| <i>Errfi1</i>        | NM_133753.1    | 8.917  | 9.306  | 0.389 | 0.002 | 0.259 |
| <i>Ccdc117</i>       | NM_134033.1    | 9.134  | 9.525  | 0.391 | 0.007 | 0.362 |
| <i>1810054D07Rik</i> | NM_027238.2    | 8.155  | 8.548  | 0.393 | 0.005 | 0.337 |
| <i>LOC674427</i>     | XR_030796.1    | 8.457  | 8.85   | 0.393 | 0.011 | 0.407 |
| <i>Accs</i>          | NM_183220.2    | 9.242  | 9.637  | 0.394 | 0.009 | 0.393 |
| <i>Actb</i>          | NM_007393.3    | 8.265  | 8.66   | 0.395 | 0.136 | 0.73  |
| <i>H2-Q6</i>         | NM_207648.1    | 9.216  | 9.612  | 0.396 | 0.032 | 0.541 |
| <i>Mycbp2</i>        | NM_207215.2    | 11.013 | 11.409 | 0.397 | 0.003 | 0.293 |
| <i>EG384179</i>      | XM_912278.3    | 8.256  | 8.653  | 0.397 | 0.049 | 0.597 |
| <i>LOC675899</i>     | XM_985882.1    | 11.245 | 11.645 | 0.4   | 0.031 | 0.536 |
| <i>Ttc3</i>          | NM_009441.2    | 8.364  | 8.766  | 0.402 | 0.012 | 0.426 |
| <i>Ogfrl1</i>        | XM_973033.1    | 7.87   | 8.273  | 0.403 | 0.014 | 0.444 |
| <i>Cldn10</i>        | NM_023878.2    | 8.244  | 8.649  | 0.405 | 0.001 | 0.223 |
| <i>Wdr51b</i>        | NM_027740.3    | 9.212  | 9.619  | 0.406 | 0     | 0.093 |
| <i>LOC385615</i>     | XM_358790.1    | 10.099 | 10.505 | 0.407 | 0.002 | 0.259 |
| <i>A230050P20Rik</i> | NM_175687.1    | 10.425 | 10.832 | 0.407 | 0.012 | 0.415 |
| <i>D330028D13Rik</i> | NM_172727.2    | 8.307  | 8.715  | 0.408 | 0.002 | 0.254 |
| <i>Adh1</i>          | NM_007409.2    | 7.755  | 8.163  | 0.408 | 0.003 | 0.293 |
| <i>Icam1</i>         | NM_010493.2    | 9.248  | 9.656  | 0.408 | 0.03  | 0.534 |
| <i>Ldhd</i>          | NM_027570.3    | 7.44   | 7.849  | 0.409 | 0.001 | 0.223 |
| <i>9430079M16Rik</i> | NM_175414.2    | 7.677  | 8.086  | 0.409 | 0.003 | 0.281 |
| <i>LOC100040505</i>  | XM_001475564.1 | 8.977  | 9.389  | 0.411 | 0     | 0.098 |
| <i>Arsb</i>          | NM_009712.3    | 8.87   | 9.283  | 0.413 | 0     | 0.153 |
| <i>C030048B08Rik</i> | NM_172991.2    | 10.389 | 10.806 | 0.416 | 0.007 | 0.366 |
| <i>Trub1</i>         | NM_028115.2    | 9.256  | 9.672  | 0.416 | 0.007 | 0.361 |
| <i>Rab6b</i>         | NM_173781.3    | 9.212  | 9.63   | 0.418 | 0.001 | 0.244 |
| <i>Gm484</i>         | NM_001033356.2 | 7.866  | 8.285  | 0.419 | 0.007 | 0.366 |
| <i>LOC623121</i>     | XM_001480713.1 | 12.083 | 12.505 | 0.422 | 0.016 | 0.455 |
| <i>Xist</i>          | NR_001463.2    | 11.926 | 12.35  | 0.424 | 0.006 | 0.346 |
| <i>Rundc3b</i>       | NM_198620.1    | 8.51   | 8.939  | 0.43  | 0     | 0.089 |
| <i>Xist</i>          | NR_001463.2    | 11.783 | 12.215 | 0.432 | 0.016 | 0.457 |

|                      |                |        |        |       |       |       |
|----------------------|----------------|--------|--------|-------|-------|-------|
| <i>Trub1</i>         | NM_028115.2    | 9.194  | 9.628  | 0.434 | 0.003 | 0.293 |
| <i>Ctsw</i>          | NM_009985.3    | 12.385 | 12.82  | 0.435 | 0.004 | 0.303 |
| <i>Ppic</i>          | NM_008908.1    | 9.332  | 9.778  | 0.445 | 0.003 | 0.293 |
| <i>Itgae</i>         | NM_008399.1    | 7.897  | 8.343  | 0.446 | 0.001 | 0.244 |
| <i>Ltb</i>           | NM_008518.1    | 11.509 | 11.965 | 0.456 | 0.001 | 0.236 |
| <i>Gpsm1</i>         | NM_153410.4    | 9.322  | 9.777  | 0.456 | 0.006 | 0.343 |
| <i>Fanci</i>         | NM_145946.2    | 7.794  | 8.252  | 0.458 | 0.005 | 0.328 |
| <i>Magi1</i>         | NM_001029850.2 | 7.013  | 7.472  | 0.46  | 0.014 | 0.442 |
| <i>Tmem108</i>       | NM_178638.2    | 9.636  | 10.097 | 0.461 | 0.006 | 0.359 |
| <i>lqgap2</i>        | NM_027711.1    | 9.415  | 9.88   | 0.465 | 0     | 0.153 |
| <i>Gbp3</i>          | NM_018734.3    | 8.508  | 8.973  | 0.465 | 0.004 | 0.302 |
| <i>Il8ra</i>         | NM_178241.4    | 7.187  | 7.653  | 0.466 | 0     | 0.157 |
| <i>Egr2</i>          | NM_010118.1    | 10.3   | 10.767 | 0.467 | 0.001 | 0.184 |
| <i>Tgif1</i>         | NM_009372.2    | 7.708  | 8.176  | 0.468 | 0.002 | 0.254 |
| <i>EG665378</i>      | NM_001081746.1 | 8.774  | 9.256  | 0.483 | 0.005 | 0.326 |
| <i>Usp11</i>         | NM_145628.3    | 7.42   | 7.904  | 0.484 | 0.001 | 0.249 |
| <i>Dusp2</i>         | NM_010090.2    | 12.918 | 13.406 | 0.488 | 0     | 0.147 |
| <i>Rp23-357i14.1</i> | NM_001085518.1 | 8.835  | 9.325  | 0.49  | 0.003 | 0.281 |
| <i>Snf1lk</i>        | NM_010831.2    | 8.287  | 8.78   | 0.494 | 0     | 0.153 |
| <i>Klf9</i>          | NM_010638.4    | 9.353  | 9.847  | 0.494 | 0.002 | 0.257 |
| <i>Irs2</i>          | NM_001081212.1 | 9.099  | 9.597  | 0.499 | 0.005 | 0.337 |
| <i>Cldn10</i>        | NM_021386.3    | 9.035  | 9.537  | 0.502 | 0     | 0.153 |
| <i>Eif4a2</i>        | NM_013506.1    | 10.507 | 11.013 | 0.506 | 0.009 | 0.384 |
| <i>Actb</i>          | NM_007393.1    | 8.292  | 8.802  | 0.511 | 0.126 | 0.718 |
| <i>Itgae</i>         | NM_008399.1    | 7.869  | 8.394  | 0.525 | 0.005 | 0.328 |
| <i>Pstpip2</i>       | NM_013831.4    | 8.417  | 8.952  | 0.535 | 0.014 | 0.441 |
| <i>Abcb1b</i>        | NM_011075.1    | 8.042  | 8.589  | 0.547 | 0.004 | 0.308 |
| <i>Gbp3</i>          | NM_018734.2    | 8.207  | 8.771  | 0.564 | 0     | 0.04  |
| <i>Ldhd</i>          | NM_027570.3    | 7.228  | 7.798  | 0.571 | 0     | 0.153 |
| <i>Ank</i>           | NM_020332.3    | 7.842  | 8.427  | 0.586 | 0.001 | 0.238 |
| <i>Folr4</i>         | NM_176807.3    | 8.462  | 9.053  | 0.592 | 0     | 0.168 |

|                      |                |        |        |       |       |       |
|----------------------|----------------|--------|--------|-------|-------|-------|
| <i>Camk2b</i>        | NM_007595.3    | 7.891  | 8.486  | 0.594 | 0     | 0.171 |
| <i>A630023P12Rik</i> | NM_173766.2    | 8.824  | 9.43   | 0.606 | 0.026 | 0.515 |
| <i>Stx1a</i>         | NM_016801.3    | 10.363 | 10.971 | 0.608 | 0     | 0.153 |
| <i>LOC100046770</i>  | XM_001476780.1 | 8.55   | 9.169  | 0.619 | 0     | 0.098 |
| <i>Ccl4</i>          | NM_013652.2    | 8.584  | 9.203  | 0.619 | 0.022 | 0.496 |
| <i>Folr4</i>         | NM_176807.3    | 8.578  | 9.205  | 0.627 | 0.001 | 0.24  |
| <i>Tgif1</i>         | NM_009372.2    | 8.75   | 9.38   | 0.63  | 0.001 | 0.223 |
| <i>Actb</i>          | NM_007393.3    | 11.825 | 12.455 | 0.63  | 0.144 | 0.734 |
| <i>Art4</i>          | NM_026639.2    | 8.98   | 9.616  | 0.636 | 0     | 0.128 |
| <i>Art2b</i>         | NM_019915.2    | 7.874  | 8.529  | 0.655 | 0     | 0.098 |
| <i>Lpxn</i>          | NM_134152.3    | 10.975 | 11.636 | 0.661 | 0.001 | 0.184 |
| <i>Dusp2</i>         | NM_010090.2    | 11.848 | 12.511 | 0.663 | 0     | 0.128 |
| <i>Igf1r</i>         | NM_010513.2    | 8.117  | 8.786  | 0.669 | 0.001 | 0.244 |
| <i>H2-Ob</i>         | NM_010389.3    | 8.558  | 9.228  | 0.67  | 0.003 | 0.281 |
| <i>Ebi2</i>          | NM_183031.1    | 10.663 | 11.341 | 0.678 | 0     | 0.049 |
| <i>Arrdc3</i>        | NM_178917.2    | 8.788  | 9.469  | 0.68  | 0.014 | 0.444 |
| <i>Magi1</i>         | NM_010367.2    | 7.046  | 7.749  | 0.703 | 0.004 | 0.315 |
| <i>2610035D17Rik</i> | XM_902349.2    | 9.242  | 9.956  | 0.714 | 0     | 0.078 |
| <i>Gfi1</i>          | NM_010278.1    | 9.533  | 10.264 | 0.731 | 0     | 0.127 |
| <i>Foxq1</i>         | NM_008239.3    | 7.228  | 7.981  | 0.753 | 0     | 0.04  |
| <i>Adam11</i>        | NM_009613.1    | 8.105  | 8.93   | 0.825 | 0     | 0.04  |
| <i>Eng</i>           | NM_007932.1    | 7.963  | 8.816  | 0.853 | 0.001 | 0.232 |
| <i>Rgs1</i>          | NM_015811.1    | 9.251  | 10.167 | 0.916 | 0.002 | 0.269 |
| <i>Rgs1</i>          | NM_015811.1    | 10.054 | 10.997 | 0.943 | 0     | 0.128 |
| <i>Rgs1</i>          | NM_015811.1    | 9.268  | 10.247 | 0.979 | 0     | 0.156 |
| <i>Slc15a2</i>       | NM_021301.1    | 8.733  | 10.155 | 1.423 | 0.002 | 0.254 |
| <i>Slc15a2</i>       | XM_147213.1    | 9.697  | 11.197 | 1.501 | 0     | 0.04  |
| <i>Gbp1</i>          | NM_010259.2    | 6.973  | 9.273  | 2.3   | 0     | 0.04  |

## Supplemental Table 2. List of Primers

### Real-time Primers

|                     |                                |
|---------------------|--------------------------------|
| <i>mPdlim4</i> -1F  | 5'-CACCATCTCGCGGGTTCAT-3'      |
| <i>mPdlim4</i> -1R  | 5'-GCAGCCTTTAATGCGGTCT-3'      |
| <i>mSIP1</i> -1F    | 5'-ATGGTGTCCACTAGCATCCC-3'     |
| <i>mSIP1</i> -1R    | 5'-CGATGTTCAACTTGCCTGTGTAG-3'  |
| <i>mKlf2</i> -1F    | 5'-CTAAAGGCGCATCTGCGTA-3'      |
| <i>mKlf2</i> -1R    | 5'-TAGTGGCGGGTAAGCTCGT-3'      |
| <i>mAmigo2</i> -1F  | 5'-CTGTGTCTGTTGGTGATCGCA-3'    |
| <i>mAmigo2</i> -1R  | 5'-CGGGCACCTTAGATAGGTTTTTG-3'  |
| <i>mCCR7</i> -1F    | 5'-GCTCCAGGCACGCAACTTT-3'      |
| <i>mCCR7</i> -1R    | 5'-GACTACCACCACGGCAATGA-3'     |
| <i>mSlc15a2</i> -1F | 5'-GGCACGGACTAGATACTTCTCG-3'   |
| <i>mSlc15a2</i> -1R | 5'-AACGGCTGTTACATCCTTTT-3'     |
| <i>mCD62L</i> -1F   | 5'-TGGCAAGGCGGTTAAAAA-3'       |
| <i>mCD62L</i> -1R   | 5'-AAAACCTGCAGCAGACTGTGG-3'    |
| <i>mIgfbp4</i> -1F  | 5'-AGAAGCCCCTGCGTACATTG-3'     |
| <i>mIgfbp4</i> -1R  | 5'-TGTCCCCACGATCTTCATCTT-3'    |
| <i>mGbp1</i> -1F    | 5'-ACAACCTCAGCTAACTTTGTGGG-3'  |
| <i>mGbp1</i> -1R    | 5'-TGATACACAGGCGAGGCATATTA-3'  |
| <i>mLgals1</i> -1F  | 5'-AACCTGGGGAATGTCTCAAAGT-3'   |
| <i>mLgals1</i> -1R  | 5'-GGTGATGCACACCTCTGTGA-3'     |
| <i>mErdr1</i> -1F   | 5'-GGTCAAGATGTATGTGCCACC-3'    |
| <i>mErdr1</i> -1R   | 5'-GCTTCTACGTGTGTGCTTTTCG-3'   |
| <i>mSamhd1</i> -1F  | 5'-CAGCTCATTCCGGGTGTACTGT-3'   |
| <i>mSamhd1</i> -1R  | 5'-GTGGCTTGGTGAAGTCCCT-3'      |
| <i>mAkr1c18</i> -1F | 5'-TCGTCCAGAGTTGGTCAGAC-3'     |
| <i>mAkr1c18</i> -1R | 5'-GCCTGGCCTATCTCTTCTTCAT-3'   |
| <i>mAdam11</i> -1F  | 5'-ATCGTAGAGCCTAAGGAGATAGC-3'  |
| <i>mAdam11</i> -1R  | 5'-TTGGGGAGAGCAGACTGGG-3'      |
| <i>mActin</i> -1F   | 5'-CCTCTGGTCGTACCACAG-3'       |
| <i>mActin</i> -1R   | 5'-GCCACAGGATTCCATACCC-3'      |
| <i>mGapdh</i> -1F   | 5'-CTGCACCACCAACTGCTTAG-3'     |
| <i>mGapdh</i> -1R   | 5'-GTCGCTGTTGAAGTCAGAGG-3'     |
| <i>mCCR5</i> -1F    | 5'-AGGCCATGCAGGCAACAG-3'       |
| <i>mCCR5</i> -1R    | 5'-TCTCTCCAACAAAGGCATAGATGA-3' |

### ChIP-qPCR Primers

|                    |                            |
|--------------------|----------------------------|
| <i>mPdlim4</i> -2F | 5'-TCCTCCGTGTCCGGCTCCAG-3' |
| <i>mPdlim4</i> -2R | 5'-GCGGAAGCCCCAGGGTGAAG-3' |
| <i>mSIP1</i> -2F   | 5'-GAGAGGGGAACCCCCGGTCC-3' |
| <i>mSIP1</i> -2R   | 5'-CCTCCACCCCCTCCACTCCG-3' |

## sgRNA Primers

|                          |                                    |
|--------------------------|------------------------------------|
| <i>mPdlim4</i> -sgRNA-1F | 5'-CACCG ACCCA CTCGG TGACCCTGCG-3' |
| <i>mPdlim4</i> -sgRNA-1R | 5'-AAACCGCAGGGTCACCGAGTGGGTC-3'    |
| <i>mPdlim4</i> -sgRNA-2F | 5'-CACCG GCCGCGCAGGGTCACCGAGT-3'   |
| <i>mPdlim4</i> -sgRNA-2R | 5'-AAACACTCGGTGACCCTGCGCGGCC-3'    |

## Cloning Primers

|                    |                                                      |
|--------------------|------------------------------------------------------|
| <i>mPdlim4</i> -3F | 5'-TCTGCTAGCCAGCCCCCAGAGACCATGCAGG-3'                |
| <i>mPdlim4</i> -3R | 5'-GGTGCTAGCGGGCCGGAGCTGCAGCCAGAGC-3'                |
| <i>mPdlim4</i> -4F | 5'-GGGGCTAGCTGGTTGCCAGCCCCCAGAGAC-3'                 |
| <i>mPdlim4</i> -5F | 5'-AGAGCTAGCCAAGACAAGGCCCAAGAAGC-3'                  |
| <i>mPdlim4</i> -6F | 5'-ACGGCTAGCTGGTTTGGGAACAAGGCACG-3'                  |
| <i>mPdlim4</i> -7F | 5'-CCT GCTAGCGGCAGAACTCAGACATCCAAG-3'                |
| <i>mPdlim4</i> -8F | 5'-GGTGCTAGCAGCCCCCAAAGTGGGAGGGT-3'                  |
| <i>mSIP1</i> -F    | 5'-TACCCATACGATGTTCCAGATTACGCTATGGTGTCCACTAGCATC-3'  |
| <i>mSIP1</i> -R    | 5'-TTAGGAAGAAGAATTGACG-3'                            |
| <i>mSIP1</i> -M-F  | 5'-CATCCGGATCGTATCTCCTTGCAAATGCCCAACGGAGACTCTGCTG-3' |
| <i>mSIP1</i> -M-R  | 5'-GAGTCTCCGTTGGGGCATTGCAAGGAGATACGATCCGGATGAAGG-3'  |



**Supplemental Table 3. Key resources**

| REAGENT or RESOURCE                            | SOURCE           | IDENTIFIER | Concentration                   |
|------------------------------------------------|------------------|------------|---------------------------------|
| Antibodies and Proteins                        |                  |            |                                 |
| Klf2(IP)                                       | Millipore        | 09-820     | 5µg /IP reaction                |
| PDLIM4 (Western)                               | Santa Cruz       | sc-166582  | 1:250 for WB                    |
| S1P1 (IF)                                      | Thermo Fisher    | PA1-1040   | 1µg/ml for IF                   |
| Anti-mouse JMJD3 antibody (Western)            | Active motif     | 61387      | 1:250 for WB                    |
| PDLIM4 (IF and IP)                             | Abcam            | Ab6045     | 1µg/ml for IF, 5µg /IP reaction |
| Rhodamine Phalloidin                           | Cytoskeleton, In | PHDR1      | 1:100 for staining              |
| Sphingosine-1-Phosphate(S1P)                   | CAYMAN CHEMICAL  | 62570      | 50nM for CD4 T cell treatment   |
| CCR7 Monoclonal antibody                       | Invitrogen       | MA1-163    | 1:1000 for WB                   |
| S1P1(IP)                                       | R&D system       | MAB7089    | 5µg /IP reaction                |
| HA                                             | Invitrogen       | 26183-HRP  | 1:500 for WB                    |
| FLAG                                           | Thermo Fisher    | MA1-91878  | 1:2000 for WB                   |
| Alexa Fluor 488 donkey anti-goat IgG           | Invitrogen       | A11055     | 1:1000 for IF                   |
| Alexa Fluor 488 donkey anti-mouse IgG          | Invitrogen       | A21202     | 1:1000 for IF                   |
| Cy5 goat anti rabbit IgG                       | Life techno      | A10523     | 1:1000 for IF                   |
| WDR5                                           | Santa Cruz       | sc-47572   | 1:250 for WB                    |
| Klf2                                           | Santa Cruz       | sc-18690   | 1:500 for WB                    |
| GAPDH                                          | Santa Cruz       | sc-47724   | 1:1000 for WB                   |
| anti-Mouse IgG-HRP                             | Thermo Fisher    | 31430      | 1:2500 for WB                   |
| anti-Rabbit IgG-HRP                            | Thermo Fisher    | 31460      | 1:2500 for WB                   |
| anti-Goat IgG-HRP                              | Thermo Fisher    | A15999     | 1:1000 for WB                   |
| Functional Grade anti-mouse CD3 Clone:145-2C11 | eBioscience      | 16-0031-82 | 1:500 for stimulation           |
| Functional Grade anti-mouse CD28 Clone:37.51   | eBioscience      | 16-0281-86 | 1:1000 for stimulation          |
| Anti-mouse CD3 PE Clone:eBio500A2              | eBioscience      | 12-0033-83 | 1:100 for FACS                  |
| Anti-mouse CD4 eFluor450 Clone:GK1.5           | eBioscience      | 48-0041-82 | 1:100 for FACS                  |
| Anti-Mouse CD8 APC Clone:53-6.7                | eBioscience      | 17-0081-83 | 1:100 for FACS                  |
| Anti-Mouse V 3.2 TCR FITC Clone3-16            | BD Bioscience    | 553219     | 1:100 for FACS                  |
| Anti-mouse CD4 APC Clone:RM4-5                 | eBioscience      | 17-0042-82 | 1:100 for FACS                  |
| Anti-Mouse CD8b FITC Clone53-5.8               | BD Bioscience    | 553040     | 1:100 for FACS                  |
| Klf2                                           | Invitrogen       | PA5-40591  | 1:1000 for WB                   |
| Anti-Mouse CCR7 PE Clone: 4B12                 | eBioscience      | 12-1971-82 | 1:100 for FACS                  |
| Anti-Mouse CD62L FITC Clone: MEL-14            | eBioscience      | 17-0621-85 | 1:100 for FACS                  |
| Jmjd3                                          | Santa Cruz       | sc-130157  | 1:100 for WB                    |
| Anti-mouse JMJD3 antibody                      | ABGENT           | AP1022b    | 1:500 for WB                    |
| Anti-mouse CD3 PE-Cy5 Clone:145-2C11           | eBioscience      | 15-0031-83 | 1:100 for FACS                  |
| S1P1(WB)                                       | Santa Cruz       | sc-48356   | 1:200 for WB                    |
| Recombinant Murine Exodus-2 (CCL21)            | PEPROTECH        | 250-13     | 40ng/ml CD4 T cell treatment    |
| FITC rat Isotype control                       | BD Pharmingen    | 554684     | 1:100 for FACS                  |
| FITC Mouse IgG isotype control                 | BD Pharmingen    | 554679     | 1:100 for FACS                  |
| PE Mouse IgG isotype control                   | BioLegend        | 400112     | 1:100 for FACS                  |
| APC Mouse IgG isotype control                  | BioLegend        | 400120     | 1:100 for FACS                  |
| Mouse IgG isotype control                      | Thermo Fisher    | 31903      |                                 |
| Rabbit IgG isotype control                     | Thermo Fisher    | 10500C     |                                 |

|                                               |                  |       |                    |
|-----------------------------------------------|------------------|-------|--------------------|
| Goat IgG isotype control                      | Thermo Fisher    | 31245 |                    |
| Rat IgG isotype control                       | Thermo Fisher    | 10700 |                    |
| <b>Critical Commercial Kit and Assays</b>     |                  |       |                    |
| ChIP Sample Prep Kit                          | Cell Signaling   |       | 9003               |
| Actin Binding Protein Spin-Down Assay Kit     | Cytoskeleton, In |       | BK001              |
| Mouse CD4 Naïve T cell enrichment kit         | ThermoFisher     |       | 8804682474         |
| NEB HiFi DNA assembly Master mix              | NEB              |       | E2621              |
| Fluoroshield Mounting Medium with DAPI        | Abcam            |       | Ab104139           |
| BD Matrigel                                   | BD               |       | 356231             |
| Anti-HA Beads                                 | Pierce           |       | 88837              |
| Anti-FLAG Beads                               | Pierce           |       | A36798             |
| GST Spin Purification kit                     | Pierce           |       | 16107              |
| <b>Deposited Data</b>                         |                  |       |                    |
| ChIP-seq                                      |                  |       | GSE58775           |
|                                               |                  |       |                    |
|                                               |                  |       |                    |
|                                               |                  |       |                    |
| <b>Experimental Models: Cell Lines</b>        |                  |       |                    |
| 293GP                                         | ATCC             |       | ATCC CRL-3215      |
|                                               |                  |       |                    |
|                                               |                  |       |                    |
| <b>Experimental Models: Organisms/Strains</b> |                  |       |                    |
| <i>Rag2<sup>-/-</sup>γc<sup>-/-</sup></i>     | Taconic          |       | 4111               |
| RAG1 <sup>B<sup>w</sup></sup> TRP-1           | Jackson Lab      |       | 008684             |
| 2D2                                           | Jackson Lab      |       | 006912             |
| C57BL/6                                       | Jackson Lab      |       | 000664             |
| NSG                                           | Jackson Lab      |       | 005557             |
| <i>Jmjd3<sup>fl/fl</sup></i> :CD4-Cre         | This paper       |       | N/A                |
|                                               |                  |       |                    |
|                                               |                  |       |                    |
| <b>Recombinant DNA</b>                        |                  |       |                    |
| FUGW- <i>Pdlim4</i> -GFP                      | This paper       |       | N/A                |
| FUGW-GFP                                      | This paper       |       | N/A                |
| pCLIG- <i>Jmjd3</i> -IRES-GFP                 | This paper       |       | N/A                |
| pCLIG- <i>Pdlim4</i> -IRES-GFP                | This paper       |       | N/A                |
| LentiGuide-Puro                               | Addgene          |       | 52963              |
| LentiCRISPR V2                                | Addgene          |       | 52961              |
| pcDNA3.1-HA- <i>Slp1</i>                      | This paper       |       | N/A                |
| pcDNA3.1-FLAG- <i>Pdlim4</i>                  | This paper       |       | N/A                |
|                                               |                  |       |                    |
|                                               |                  |       |                    |
| <b>Software and Algorithms</b>                |                  |       |                    |
| Image J                                       |                  |       |                    |
| Image Lab Software                            | Bio-Rad          |       | Image Lab Software |

|                                |                   |                |
|--------------------------------|-------------------|----------------|
| NIS-Elements                   | Nikon             | NIS-Elements   |
| GraphPad Prism                 | Graphpad Software | GraphPad Prism |
|                                |                   |                |
| <b>Other</b>                   |                   |                |
| BL21(DE3)pLysS Competent Cells | Promega           | L1195          |
